# Supplementary material for: A review of properties, occurrence, fate, and transportation mechanisms of contaminants of emerging concern in sewage sludge, biosolids, and soils: recent advances and future trends
Source: Frontiers journal article supplement (doi:10.3389/fenvc.2025.1547596), 2025-03-03
Supplement: Table_1.xlsx [file Table_1.xlsx]

## Sheet: Sheet 1-REFERENCES
			Authors (Publication Year)	Title	Article cited in the article
			PHARMACEUTICAL PRODUCTS (PPs)
	1	1	Silva et al. (2021)	Occurrence of pharmaceutical active compounds in sewage sludge from two urban wastewater treatment plants and their potential behaviour in agricultural soils	Yes
	2	2	Mercl et al. (2020)	Pyrolysis of biosolids as an effective tool to reduce the uptake of pharmaceuticals by plants	Yes
	3	3	Riva et al. (2020)	A multi-residue analytical method for extraction and analysis of pharmaceuticals and other selected emerging contaminants in sewage sludge	Yes
	4	4	Moško J. et al. (2020)	Effect of pyrolysis temperature on removal of organic pollutants present in anaerobically stabilized sewage sludge	Yes
	5	5	Kumirska et al. (2019)	Determination of twenty pharmaceutical contaminants in soil using ultrasound-assisted extraction with gas chromatography-mass spectrometric detection	Yes
	6	6	Guironnet et al. (2022a)	Improvement of the QuEChERS extraction step by matrix-dispersion effect and application on beta-lactams analysis in wastewater sludge by LC-MS/ MS	Yes
	7	7	Guironnet et al. (2022b)	Advantages of MS/MS/MS (MRM3) vs classic MRM quantification for complex environmental matrices: Analysis of beta-lactams in WWTP sludge	Yes
	8	8	Bastos et al. (2020)	Occurrence, fate and environmental risk assessment of pharmaceutical compounds in soils amended with organic wastes	Yes
	9	9	Malvar et al. (2020a)	Comparison of ultrasound-assisted extraction, QuEChERS and selective pressurized liquid extraction for the determination of metabolites of parabens and pharmaceuticals in sludge	Yes
	10	10	Malvar et al. (2020b)	Simultaneous pressurized liquid extraction and clean-up for the determination of metabolites in complex environmental solid matrices	Yes
	11	11	Gewurtz et al. (2022)	Influence of Conjugation on the Fate of Pharmaceuticals and Hormones in Canadian Wastewater Treatment Plants	Yes
	12	12	Castro et al. (2018)	Determination of cardiovascular drugs in sewage sludge by matrix solid-phase dispersion and ultra-performance liquid chromatography tandem mass spectrometry	Yes
	13	13	Svahn et al. (2019)	Extraction Efficiency of a Commercial Espresso Machine Compared to a Stainless-Steel Column Pressurized Hot Water Extraction (PHWE) System for the Determination of 23 Pharmaceuticals, Antibiotics and Hormones in Sewage Sludge	Yes
	14	14	Gros et al. (2020)	Pharmaceuticals in source separated sanitation systems: Fecal sludge and blackwater treatment	Yes
	15	15	Perez-Lemus et al. (2020)	Sample pre-treatment and analytical methodology for the simultaneous determination of pharmaceuticals and personal care products in sewage sludge	Yes
	16	16	Rashid et al. (2020)	Simultaneous analysis of multiclass antibiotic residues in complex environmental matrices by liquid chromatography with tandem quadrupole mass spectrometry	Yes
	17	17	Magee et al. (2018)	US nationwide reconnaissance of ten infrequently monitored antibiotics in municipal biosolids	Yes
	18	18	Costa et al. (2020)	Simultaneous HPLC-PDA determination of commonly prescribed antidepressants and caffeine in sludge from sewage treatment plants and river sediments in the Itaipu reservoir region, Parana, Brazil	Yes
	19	19	Li et al. (2021)	Simultaneous quantification of five pharmaceuticals and personal care products in biosolids and their fate in thermo-alkaline treatment	Yes
	20	20	Abril et al. (2018)	Determination of perfluorinated compounds, bisphenol A, anionic surfactants and personal care products in digested sludge, compost and soil by liquid-chromatography-tandem mass spectrometry	Yes
	21	21	Abril et al. (2019)	Occurrence, fate and environmental risk of anionic surfactants, bisphenol A, perfluorinated compounds and personal care products in sludge stabilization treatments	Yes
	22	22	Villette et al. (2023)	Mass spectrometry imaging for biosolids characterization to assess ecological or health risks before reuse	Yes
	23	23	Ebele et al. (2017)	Pharmaceuticals and personal care products (PPCPs) in the freshwater aquatic environment	Yes
	24	24	Fick (2019)	Contamination of surface, ground, and drinking water from pharmaceutical production	Yes
	25	25	Pérez et al. (2023)	Influence of exposure time, physicochemical properties, and plant transpiration on the uptake dynamics and translocation of pharmaceutical and personal care products in the aquatic macrophyte Typha latifolia	Yes
	26	26	Ikehata (2007)	Degradation of Aqueous Pharmaceuticals by Ozonation and Advanced Oxidation Processes: A Review	Yes
	27	27	Shayesteh et al. (2015)	Application of chemometrics in determination of the acid dissociation constants (pKa) of several benzodiazepine derivatives as poorly soluble drugs in the presence of ionic surfactants	Yes
	28	28	Kinnunen et al. (2019)	Updated Clinical Pharmacokinetics and Pharmacodynamics of Oxycodone	Yes
	29	29	Chabilan (2022)	Impact of log(Kow) Value on the Extraction of Antibiotics from River Sediments with Pressurized Liquid Extraction	Yes
	30	30	Zhang et al. (2014)	Sorption-desorption and transport of trimethoprim and sulfonamide antibiotics in agricultural soil: effect of soil type, dissolved organic matter, and pH	Yes
	31	31	Zhi et al. (2019)	Current progress in the adsorption, transport and biodegradation of antibiotics in soil	Yes
	32	32	Ahmed et al. (2015)	Interaction of polar and nonpolar organic pollutants with soil organic matter: Sorption experiments and molecular dynamics simulation	Yes
	33	33	(Tisler ee al. (2021)	Identification of more than 100 new compounds in the wastewater: Fate of polyethylene/polypropylene oxide copolymers and their metabolites in the aquatic environment	Yes
	34	34	Shahid et al. (2021)	Current advances in treatment technologies for removal of emerging contaminants from water – A critical review	Yes
	35	35	Conde-Cid et al. (2020)	Effects of pine bark amendment on the transport of sulfonamide antibiotics in soils	Yes
	36	36	Carda-Broch (2004)	Countercurrent Chromatography for the Measurement of the Hydrophobicity of Sulfonamide Amphoteric Compounds	Yes
	37	37	Schaffer et al. (2012)	Sorption influenced transport of ionizable pharmaceuticals onto a natural sandy aquifer sediment at different pH	Yes
	38	38	OP Bansal (2022)	Antibiotics in the environment: A review	Yes
	39	39	Srinivasan et al. (2013)	Co-contaminants and factors affecting the sorption behaviour of two sulfonamides in pasture soils	Yes
	40	40	Klement et al. (2018)	Sorption of citalopram, irbesartan and fexofenadine in soils: Estimation of sorption coefficients from soil properties	Yes
	41	41	Xu et al. (2020)	Sorption of pharmaceuticals and personal care products on soil and soil components: Influencing factors and mechanisms	Yes
	42	42	Arnnok et al. (2017)	Selective Uptake and Bioaccumulation of Antidepressants in Fish from Effluent-Impacted Niagara River	Yes
	43	43	Madikizela et al. (2018)	Uptake of pharmaceuticals by plants grown under hydroponic conditions and natural occurring plant species: A review	Yes
	44	44	Shaheen et al. (2022)	Fate, transport, and risk assessment of widely prescribed pharmaceuticals in terrestrial and aquatic system - A review	Yes
	45	45	Luo et al. (2010)	Trends in Antibiotic Resistance Genes Occurrence in the Haihe River, China	Yes
	46	46	Hou et al. (2015)	Occurrence and distribution of sulfonamides, tetracyclines, quinolones, macrolides, and nitrofurans in livestock manure and amended soils of Northern China	Yes
	47	47	Scaria et al. (2021)	Tetracyclines in the environment: An overview on the occurrence, fate, toxicity, detection, removal methods, and sludge management	Yes
	48	48	Conde-Cid et al. (2020b)	Tetracycline and Sulfonamide Antibiotics in Soils: Presence, Fate and Environmental Risks	Yes
	49	49	Okon et al. (2022)	Antimicrobial resistance in fish and poultry: Public health implications for animal source food production in Nigeria, Egypt, and South Africa	Yes
	50	50	Feng et al. (2013)	Removal of residual anti-inflammatory and analgesic pharmaceuticals from aqueous systems by electrochemical advanced oxidation processes. A review	Yes
			PERSONAL CARE PRODUCTS (PCPs)
	51	1	Zhu et al. (2019)	Spatial distribution of parabens, triclocarban, triclosan, bisphenols, and tetrabromobisphenol A and its alternatives in municipal sewage sludges in China	Yes
	52	2	Ma et al. (2018)	Concentrations and fate of parabens and their metabolites in two typical wastewater treatment plants in northeastern China	Yes
	53	3	Chen et al. (2021)	Occurrence of parabens in outdoor environments: Implications for human exposure assessment	Yes
	54	4	Chen et al. (2018)	Nationwide reconnaissance of five parabens, triclosan, triclocarban and its transformation products in sewage sludge from China	Yes
	55	5	Cavanagh (2018)	Assessment of endocrine disruption and oxidative potential of bisphenol-A, triclosan, nonylphenol, diethylhexyl phthalate, galaxolide, and carbamazepine, common contaminants of municipal biosolids	Yes
	56	6	Ye et al. (2006)	Parabens as Urinary Biomarkers of Exposure in Humans	Yes
	57	7	Soni et al. (2005)	Safety assessment of esters of p-hydroxybenzoic acid (parabens)	Yes
	58	8	Chen et al. (2008)	Triclocarban Enhances Testosterone Action: A New Type of Endocrine Disruptor?	Yes
	59	9	Carey et al. (2014)	The impact of triclosan on the spread of antibiotic resistance in the environment	Yes
	60	10	Carey et al. (2016)	Triclocarban Influences Antibiotic Resistance and Alters Anaerobic Digester Microbial Community Structure	Yes
	61	11	Li et al. (2019)	Concentration and distribution of parabens, triclosan, and triclocarban in pregnant woman serum in China	Yes
	62	12	Shin et al. (2019)	Pharmacokinetic profile of propyl paraben in humans after oral administration	Yes
	63	13	Liang et al. (2023)	Studying paraben-induced estrogen receptor- and steroid hormone-related endocrine disruption effects via multi-level approaches	Yes
	64	14	Assens et al. (2019)	Variations in repeated serum concentrations of UV filters, phthalates, phenols and parabens during pregnancy	Yes
	65	15	Artacho-Cordón (2018)	Environmental phenols and parabens in adipose tissue from hospitalized adults in Southern Spain	Yes
	66	16	Armstrong et al. (2019)	Fate of triclosan, triclocarban, and their transformation products in wastewater under nitrifying conditions	Yes
	67	17	Armstrong et al. (2018)	Degradation of triclosan and triclocarban and formation of transformation products in activated sludge using benchtop bioreactors	Yes
	68	18	Wang et al. (2020)	The fate of triclocarban in activated sludge and its influence on biological wastewater treatment system	Yes
	69	19	Lozano et al. (2010)	Fate of triclosan in agricultural soils after biosolid applications	Yes
	70	20	Anand et al. (2022)	Occurrence, transformation, bioaccumulation, risk and analysis of pharmaceutical and personal care products from wastewater: a review	Yes
	71	21	Coogan et al. (2007)	Algal bioaccumulation of triclocarban, triclosan, and methyl-triclosan in a North Texas wastewater treatment plant receiving stream	Yes
	72	22	Kwon and Xia (2012)	Fate of triclosan and triclocarban in soil columns with and without biosolids surface application	Yes
	73	23	Ahn et al. (2008)	In vitro biologic activities of the antimicrobials triclocarban, its analogs, and triclosan in bioassay screens: receptor-based bioassay screens	Yes
			HORMONES
	74	1	Adeel et al. (2017)	Environmental impact of estrogens on human, animal and plant life: A critical review	Yes
	75	2	Zhou et al. (2012)	Occurrence and fate of steroid estrogens in the largest wastewater treatment plant in Beijing, China	Yes
	76	3	Ying and Kookana (2005)	Sorption and degradation of estrogen-like-endocrine disrupting chemicals in soil	Yes
	77	4	Olsen et al. (2007)	Leaching of Estrogenic Hormones from Manure-Treated Structured Soils	Yes
	78	5	Shi et al. (2010)	Removal of estrone, 17α-ethinylestradiol, and 17ß-estradiol in algae and duckweed-based wastewater treatment systems	Yes
	79	6	Czajka and Londry (2006)	Anaerobic biotransformation of estrogens	Yes
	80	7	Bartelt-Hunt et al. (2012)	Effect of growth promotants on the occurrence of endogenous and synthetic steroid hormones on feedlot soils and in runoff from beef cattle feeding operations	Yes
	81	8	Bai and Acharya (2019)	Removal of seven endocrine disrupting chemicals (EDCs) from municipal wastewater effluents by a freshwater green alga	Yes
	82	9	Bai and Acharya (2017)	Algae-mediated removal of selected pharmaceutical and personal care products (PPCPs) from Lake Mead water	Yes
	83	10	Diamanti-Kandarakis et al. (2009)	Endocrine-disrupting chemicals: an Endocrine Society scientific statement	Yes
	84	11	Jobling et al. (2006)	Predicted exposures to steroid estrogens in U.K. rivers correlate with widespread sexual disruption in wild fish populations	Yes
	85	12	Xuan et al. (2008)	Degradation of Estrogenic Hormones in a Silt Loam Soil	Yes
	86	13	Viglino et al. (2008)	Analysis of natural and synthetic estrogenic endocrine disruptors in environmental waters using online preconcentration coupled with LC-APPI-MS/MS	Yes
	87	14	Liu et al. (2009)	Removal mechanisms for endocrine disrupting compounds (EDCs) in wastewater treatment — physical means, biodegradation, and chemical advanced oxidation: A review	Yes
	88	15	Koubovec et al. (2005)	Synthetic progestins used in HRT have different glucocorticoid agonist properties	Yes
	89	16	Goeury et al. (2019)	Analysis of Environmental Protection Agency priority endocrine disruptor hormones and bisphenol A in tap, surface and wastewater by online concentration liquid chromatography tandem mass spectrometry	Yes
	90	17	Liu et al. (2019)	Anabolic-androgenic steroids and cardiovascular risk	Yes
	91	18	Bond et al. (2022)	Anabolic–androgenic steroids: How do they work and what are the risks?	Yes
	92	19	Johnston and Cheung (2018)	Endocrine Therapy for Breast Cancer: A Model of Hormonal Manipulation	Yes
	93	20	Sartor and Gillessen (2014)	Treatment sequencing in metastatic castrate-resistant prostate cancer	Yes
	94	21	Huang et al. (2014)	Occurrence, removal, and fate of progestogens, androgens, estrogens, and phenols in six sewage treatment plants around Dianchi Lake in China	Yes
			BISPHENOLS
	95	1	Xu et al. (2021)	Determination and occurrence of bisphenol A and thirteen structural analogs in soil	Yes
	96	2	Peng et al. (2020)	Analysis of five bisphenol compounds in sewage sludge by dispersive solid-phase extraction with magnetic montmorillonite	Yes
	97	3	Huang et al. (2020)	Occurrence, mass loads and risks of bisphenol analogues in the Pearl River Delta region, South China: Urban rainfall runoff as a potential source for receiving rivers	Yes
	98	4	Sun et al. (2018)	Determination of nine bisphenols in sewage and sludge using dummy molecularly imprinted solid-phase extraction coupled with liquid chromatography tandem mass spectrometry	Yes
	99	5	Piñero et al. (2020)	The Occurrence and Distribution of Polycyclic Aromatic Hydrocarbons, Bisphenol A and Organophosphate Flame Retardants in Indoor Dust and Soils from Public Open Spaces: Implications for Human Exposure	Yes
	100	6	Kubwabo et al. (2009)	Migration of bisphenol A from plastic baby bottles, baby bottle liners and reusable polycarbonate drinking bottles	Yes
	101	7	Park et al. (2018)	Fast and simple determination and exposure assessment of bisphenol A, phenol, p-tert-butylphenol, and diphenylcarbonate transferred from polycarbonate food-contact materials to food simulants	Yes
	102	8	vom Saal et al. (2007)	Chapel Hill bisphenol A expert panel consensus statement: Integration of mechanisms, effects in animals and potential to impact human health at current levels of exposure	Yes
	103	9	Lang et al. (2008)	Association of urinary bisphenol A concentration with medical disorders and laboratory abnormalities in adults	Yes
	104	10	Jacobson et al. (2019)	Urinary Bisphenols and Obesity Prevalence Among U.S. Children and Adolescents	Yes
	105	11	Mesnage et al. (2017)	Editor’s Highlight: Transcriptome Profiling Reveals Bisphenol A Alternatives Activate Estrogen Receptor Alpha in Human Breast Cancer Cells	Yes
	106	12	Pelch et al. (2017)	NTP Research Report on Biological Activity of Bisphenol A (BPA) Structural Analogues and Functional Alternatives: Research Report 4 [Internet]	Yes
	107	13	Wang et al. (2019)	Insights into removal mechanisms of bisphenol A and its analogues in municipal wastewater treatment plants	Yes
	108	14	Xue et al. (2019)	Mass flows and removal of eight bisphenol analogs, bisphenol A diglycidyl ether and its derivatives in two wastewater treatment plants in New York State, USA	Yes
	109	15	Zhang et al. (2015)	A study on temporal trends and estimates of fate of Bisphenol A in agricultural soils after sewage sludge amendment	Yes
	110	16	Rochester et al. (2015)	Bisphenol S and F: A Systematic Review and Comparison of the Hormonal Activity of Bisphenol A Substitutes	Yes
	111	17	Viñas et al. (2013)	Bisphenol S disrupts estradiol-induced nongenomic signaling in a rat pituitary cell line: effects on cell functions	Yes
			PHTHALIC ACID ESTERS (PAEs)
	112	1	Wang (2021)	Release of phthalate esters from a local landfill in the Tibetan Plateau: Importance of soil particle-size specific association	Yes
	113	2	Zhou (2021)	Contamination and human health risks of phthalate esters in vegetable and crop soils from the Huang-Huai-Hai region of China	Yes
	114	3	Berenstein (2021)	Environmental fate of dibutylphthalate in agricultural plastics: Photodegradation, migration and ecotoxicological impact on soil	Yes
	115	4	Brodskiy (2018)	Phthalate Esters’ Content in Soils of Moscow	Yes
	116	5	Kaewlaoyoong (2018)	Occurrence of phthalate esters around the major plastic industrial area in southern Taiwan	Yes
	117	6	Wei (2020)	Pollution characteristics and health risk assessment of phthalate esters in agricultural soil and vegetables in the Yangtze River Delta of China.	Yes
	118	7	Yoshida (2020)	Intakes of phthalates by Japanese children and the contribution of indoor air quality in their residences	Yes
	119	8	Madsen (1999)	Kinetics of di-(2-ethylhexyl)phthalate mineralization in sludge-amended soil	Yes
	120	9	Zeng (2008)	Phthalate esters (PAEs): Emerging organic contaminants in agricultural soils in peri-urban areas around Guangzhou, China	Yes
	121	10	Tuan Tran (2022)	Phthalates in the environment: characteristics, fate and transport, and advanced wastewater treatment technologies	Yes
	122	11	Lee et al. (2019)	Occurrence and emission of phthalates and non-phthalate plasticizers in sludge from wastewater treatment plants in Korea	Yes
	123	12	Salaudeen (2018)	Fate and impact of phthalates in activated sludge treated municipal wastewater on the water bodies in the Eastern Cape, South Africa	Yes
	124	13	Zhang (2021b)	Facilitating effect of heavy metals on di(2-ethylhexyl) phthalate adsorption in soil: new evidence from adsorption experiment data and quantum chemical simulation.	Yes
	125	14	Net et al. (2015)	Occurrence, Fate, Behavior and Ecotoxicological State of Phthalates in Different Environmental Matrices	Yes
	126	15	Li et al. (2017)	Occurrence, spatial distribution, historical trend and ecological risk of phthalate esters in the Jiulong River, Southeast China	Yes
	127	16	Zhang et al. (2021)	Urinary phthalate metabolite concentrations, oxidative stress and thyroid function biomarkers among patients with thyroid nodules	Yes
	128	17	Zhou et al. (2019)	The effect of di-2-ethylhexyl phthalate on inflammation and lipid metabolic disorder in rats	Yes
	129	18	Swan et al. (2005)	Decrease in anogenital distance among male infants with prenatal phthalate exposure	Yes
			SUBSTITUTED-DIPHENYLAMINES (S-DPAs)
	130	1	Liu et al. (2018)	Emerging aromatic secondary amine contaminants and related derivatives in various dust matrices in China	Yes
	131	2	Zhang et al. (2020a)	Determination of Diphenylamine Antioxidants in Wastewater/ Biosolids and Sediment	Yes
	132	3	Zhang et al. (2020b)	Diphenylamine Antioxidants in wastewater influent, effluent, biosolids and landfill leachate: Contribution to environmental releases	Yes
	133	4	Zhang et al. (2020)	Substituted diphenylamine antioxidants (SDPAs) in typical domestic wastewater treatment plants and Songhua River in the northeast of China	Yes
	134	5	Lu et al. (2019)	Occurrence of substituted diphenylamine antioxidants and benzotriazole UV stabilizers in Arctic seabirds and seals	Yes
	135	6	Lu et al. (2016)	Distribution, Partitioning and Bioaccumulation of Substituted Diphenylamine Antioxidants and Benzotriazole UV Stabilizers in an Urban Creek in Canada.	Yes
	136	7	Kessler (2014)	Ultrahigh-performance liquid chromatography/electrospray ionization linear ion trap Orbitrap mass spectrometry of antioxidants (amines and phenols) applied in lubricant engineering.	Yes
			SUBSTITUTED-p-PHENYLENEDIAMINES (S-PPDs)
	137	1	Klöckner et al. (2021)	Comprehensive characterization of tire and road wear particles in highway tunnel road dust by use of size and density fractionation	Yes
	138	2	Huang et al.(2021)	Occurrence of Substituted p‑Phenylenediamine Antioxidants in Dusts	Yes
	139	3	Hiki et al. (2022)	Concentration and leachability of N-(1,3-dimethylbutyl)-N′-phenyl-p-phenylenediamine (6PPD) and its quinone transformation product (6PPD-Q) in road dust collected in Tokyo, Japan	Yes
	140	4	Cao et al. (2022)	New Evidence of Rubber-Derived Quinones in Water, Air, and Soil	Yes
			NEONICOTINOID INSECTICIDES (NEONICS)
	141	1	Zhang (2020)	Contamination of neonicotinoid insecticides in soil-water-sediment systems of the urban and rural areas in a rapidly developing region: Guangzhou, South China	Yes
	142	2	Ying (2022)	The Characteristics and Potential Risks of Neonicotinoid Residues in Soils of Different Types of Land Use in Hangzhou	Yes
	143	3	Zhou et al. (2018)	Development of a fast and sensitive method for measuring multiple neonicotinoid insecticide residues in soil and the application in parks and residential areas	Yes
	144	4	Zhou et al. (2021)	Comparison of neonicotinoid residues in soils of different land use types	Yes
	145	5	Bonmatin (2019)	A survey and risk assessment of neonicotinoids in water, soil and sediments of Belize	Yes
	146	6	Bonmatin (2020)	Residues of neonicotinoids in soil, water and people's hair: A case study from three agricultural regions of the Philippines	Yes
	147	7	Akter et al. (2023)	Changes in soil microbial communities after exposure to neonicotinoids: A systematic review	Yes
	148	8	Simon-delso et al. (2015)	Systemic insecticides (neonicotinoids and fipronil): trends, uses, mode of action and metabolites	Yes
	149	9	Hladik et al. (2016)	First national-scale reconnaissance of neonicotinoid insecticides in streams across the USA	Yes
	150	10	Pietrzak et al. (2020)	Fate of selected neonicotinoid insecticides in soil–water systems: Current state of the art and knowledge gaps	Yes
	151	11	Gao (2019)	Simultaneous passive sampling of hydrophilic and hydrophobic emerging organic contaminants in water	Yes

## Sheet: Sheet 2-ANALYTES
				Total number of CECs investigated
				First-level grouping of CECs
				Second-level grouping CECs (therapeutic class, use, or application of CECs) & CECs detected with conventional analytical methods (GC-MS, LC-MS, LC-PDA, etc.).
				CECs detected with MALDI-MSI (Matrix-Assisted Laser Desorption Ionization Mass Spectrometry Imaging)
				List headings
				PHARMACEUTICAL PRODUCTS (PPs)
				ANALGESICS
				Nonnarcotic analgesics, antipyretics, or NSAIDs and metabolites
				Analyte	Abbreviation	Therapeutic group
	1	1	1	Acetaminophen / Paracetamol	APAP	Nonnarcotic analgesic, antipyretic, NSAID or metabolite
	2	2	2	Diclofenac	DCF	Nonnarcotic analgesic, antipyretic, NSAID or metabolite
	3	3	3	Diflunisal	DFS	Nonnarcotic analgesic, antipyretic, NSAID or metabolite
	4	4	4	Ethenzamide	ETH	Nonnarcotic analgesic, antipyretic, NSAID or metabolite
	5	5	5	Flurbiprofen	FLB	Nonnarcotic analgesic, antipyretic, NSAID or metabolite
	6	6	6	Ibuprofen	IBU	Nonnarcotic analgesic, antipyretic, NSAID or metabolite
	7	7	7	Indometacin	IND	Nonnarcotic analgesic, antipyretic, NSAID or metabolite
	8	8	8	Ketoprofen	KTP	Nonnarcotic analgesic, antipyretic, NSAID or metabolite
	9	9	9	Nalbuphine	NLB	Nonnarcotic analgesic, antipyretic, NSAID or metabolite
	10	10	10	Naproxen	NPX	Nonnarcotic analgesic, antipyretic, NSAID or metabolite
	11	11	11	Phenacetin	PCT	Nonnarcotic analgesic, antipyretic, NSAID or metabolite
	12	12	12	Salicylic acid	SA	Nonnarcotic analgesic, antipyretic, NSAID or metabolite
	13	13	13	4-hydroxydiclofenac	4H-DCF	Nonnarcotic analgesic, antipyretic, NSAID or metabolite
	14	14	14	Carboxyibuprofen	C-IBU	Nonnarcotic analgesic, antipyretic, NSAID or metabolite
	15	15	15	1-hydroxyibuprofen	1H-IBU	Nonnarcotic analgesic, antipyretic, NSAID or metabolite
	16	16	16	2-hydroxyibuprofen	2H-IBU	Nonnarcotic analgesic, antipyretic, NSAID or metabolite
				Opioid (narcotic) analgesics, stimulants and metabolites
	17	17	1	Caffeine (1,3,7-trimethylxanthine)	CAF	Stimulant
	18	18	2	Codeine	COD	Opioid (narcotic) analgesic
	19	19	3	Naloxone	NLX	Opioid agonist
	20	20	4	Tramadol	TRM	Opioid (narcotic) analgesic
	21	21	5	Varenicline	VRN	Nicotinic agonist
	22	22	6	N-desmethyltramadol	DT-TRM	Opioid (narcotic) analgesic
	23	23	7	Paraxanthine (1,7-dimethylxanthine)	PAX	Stimulant metabolite
				ANTIBIOTICS	Antibiotics
				Sulfonamides and potentiators
	24	1	1	Sulfacetamide	SCT	Sulfonamide antibiotic
	25	2	2	Sulfachloropyridazine	SCP	Sulfonamide antibiotic
	26	3	3	Sulfadiazine	SDZ	Sulfonamide antibiotic
	27	4	4	Sulfadimethoxine	SDM	Sulfonamide antibiotic
	28	5	5	Sulfadimidine/sulfamethazine	SMTZ	Sulfonamide antibiotic
	29	6	6	Sulfadoxine	SDX	Sulfonamide antibiotic
	30	7	7	Sulfaguanidine	SGD	Sulfonamide antibiotic
	31	8	8	Sulfamerazine	SMR	Sulfonamide antibiotic
	32	9	9	Sulfameter	SMT	Sulfonamide antibiotic
	33	10	10	Sulfamethizole	SMZ	Sulfonamide antibiotic
	34	11	11	Sulfamethoxazole	SMX	Sulfonamide antibiotic
	35	12	12	Sulfamethoxypyridazine	SMP	Sulfonamide antibiotic
	36	13	13	Sulfamonomethoxine	SMM	Sulfonamide antibiotic
	37	14	14	Sulfapyridine	SPY	Sulfonamide antibiotic (veterinary)
	38	15	15	Sulfaquinoxaline Na	SQX	Sulfonamide antibiotic (veterinary)
	39	16	16	Sulfathiazole	STZ	Sulfonamide antibiotic
	40	17	17	N-acetylsulfamethoxazole	A-SMX	Sulfonamide antibiotic metabolite
	41	18	18	Ormetoprim	OMP	Sulfonamide potentiator
	42	19	19	Trimethoprim	TMP	Sulfonamide potentiator
				Quinolones and fluoroquinolones
	43	20	1	Ciprofoxacin	CPF	Fluoroquinolone antibiotic
	44	21	2	Danofloxacin mesylate	DNF-M	Fluoroquinolone antibiotic (veterinary)
	45	22	3	Decoquinate	DCQ	Quinolone antibiotic
	46	23	4	Enrofloxacin	ENF	Fluoroquinolone antibiotic (veterinary)
	47	24	5	Flumequine	FMQ	Fluoroquinolone antibiotic
	48	25	6	Levofloxacin	LVF	Fluoroquinolone antibiotic
	49	26	7	Lomefloxacin	LMF	Fluoroquinolone antibiotic
	50	27	8	Nalidixic acid	NAL-A	Fluoroquinolone antibiotic
	51	28	9	Norfloxacin	NRF	Fluoroquinolone antibiotic
	52	29	10	Ofloxacin	OFL	Fluoroquinolone antibiotic
	53	30	11	Oxolinic acid	OXO-A	Quinolone antibiotic (aquaculture)
	54	31	12	Sarafloxacin	SRF	Fluoroquinolone antibiotic
				β-lactam antibiotics and metabolites
	55	32	1	Amoxicillin	AMX	β-lactam antibiotic (penicillin)
	56	33	2	Ampicillin	AMP	β-lactam antibiotic (penicillin)
	57	34	3	Cefapirin	CFP	β-lactam antibiotic (cephalosporin)
	58	35	4	Cefazolin	CFZ	β-lactam antibiotic (cephalosporin)
	59	36	5	Cefotaxime acid	CEF-A	β-lactam antibiotic (cephalosporin)
	60	37	6	Cefoxitin sodium salt	CFX-Na	β-lactam antibiotic (cephalosporin)
	61	38	7	Cefprozil	CPR	β-lactam antibiotic (cephalosporin)
	62	39	8	Cefquinome	CQM	β-lactam antibiotic (cephalosporin)
	63	40	9	Ceftiofur	CFT	β-lactam antibiotic (cephalosporin) (veterinary)
	64	41	10	Cephalexin	CPX	β-lactam antibiotic (cephalosporin)
	65	42	11	Cloxacillin	CLX	β-lactam antibiotic (penicillin)
	66	43	12	Amoxicillin-Diketopiperazine	AMX-DKP	β-lactam antibiotic (penicillin) metabolite
				Macrolides
	67	44	1	Azithromycin	AZI	Macrolide antibiotic
	68	45	2	Clarithromycin	CLR	Macrolide antibiotic
	69	46	3	Erythromycin	ERY	Macrolide antibiotic
	70	47	4	Roxithromycin	ROX	Macrolide antibiotic
	71	48	5	Spiramycin	SPR	Macrolide antibiotic
	72	49	6	Tilmicosin	TLM	Macrolide antibiotic
	73	50	7	Tylosin	TYL	Macrolide antibiotic
	74	51	8	Vancomycin	VAN	Macrolide antibiotic
	75	52	9	Dehydro-erythromycin	2H-ERY	Macrolide antibiotic metabolite
				Tetracyclines
	76	53	1	Tetracycline	TC	Tetracycline antibiotic
	77	54	2	Oxytetracycline	OTC	Tetracycline antibiotic
	78	55	3	Chlortetracycline	CTC	Tetracycline antibiotic
				Nitroimidazole
	79	56	1	Metronidazole	MTZ	Nitroimidazole
				Lincosamides
	80	57	1	Clindamycin	CLI	Lincosamide
	81	58	2	Lincomycin	LIN	Lincosamide
				Nitrofurans
	82	59	1	Furazolidone	FZD	Nitrofuran (veterinary)
				Oxazolidinones
	83	60	1	3-(2-nitrobenzylidenamino-)-2-oxazolidinone	NB-OXD	Oxazolidinone antibiotic (precursor)
				Ionophores
	84	61	1	Maduramicin	MDR	Ionophore antibiotic (veterinary)
				ANTICONVULSANTS AND ANTIEPILEPTICS
	85	1	1	Carbamazepine	CBZ	Anticonvulsant and antiepileptic
	86	2	2	Gabapentin	GAB	Anticonvulsant and antiepileptic
	87	3	3	Lamotrigine	LAM	Anticonvulsant and antiepileptic
	88	4	4	Levetiracetam	LVT	Anticonvulsant and antiepileptic
	89	5	5	Primidone	PRI	Anticonvulsant and antiepileptic
	90	6	6	Topiramate	TOP	Anticonvulsant and antiepileptic
	91	7	7	Valproic acid	VAL-A	Anticonvulsant and antiepileptic
	92	8	8	Carbamazepine-10,11-epoxide	CBZ-O	Anticonvulsant and antiepileptic (metabolite)
	93	9	9	3- hydroxycarbamazepine	3-OH-CBZ	Anticonvulsant and antiepileptic (metabolite)
	94	10	10	10,11-Dihydro-10-hydroxycarbamazepine	2H-OH-CBZ	Anticonvulsant and antiepileptic (metabolite)
	95	11	11	10,11-Dihydro-10,11-dihydroxy carbamazepine	2H-2OH-CBZ	Anticonvulsant and antiepileptic (metabolite)
	96	12	12	Lamotrigine 2-N-glucuronide	LMT-GLC	Anticonvulsant and antiepileptic (metabolite)
				ANTIDEPRESSANTS, ANTIPSYCHOTICS, AND ANXIOLYTICS
	97	1	1	Amisulpride	AMS	Atypical antipsychotic
	98	2	2	Clozapine	CLZ	Atypical antipsychotic
	99	3	3	Quetiapine	QTP	Atypical antipsychotic
	100	4	4	Norquetiapine	NRQ	Atypical antipsychotic (quetiapine metabolite)
	101	5	5	Sulpiride	SLP	Atypical antipsychotic
	102	6	6	Chlorprothixene	CPT	Typical antipsychotic
	103	7	7	Amitriptyline	AMT	Tricyclic antidepressant (TCA)
	104	8	8	Clomipramine	CLO	Tricyclic antidepressant (TCA)
	105	9	9	Dosulepin	DSL	Tricyclic antidepressant (TCA)
	106	10	10	Nortriptyline	NOR	Tricyclic antidepressant (TCA)
	107	11	11	Citalopram	CIT	Antidepressant (selective serotonin reuptake inhibitor-SSRI)
	108	12	12	Fluoxetine	FLX	Antidepressant (selective serotonin reuptake inhibitor-SSRI)
	109	13	13	Paroxetine	PRX	Antidepressant (selective serotonin reuptake inhibitor-SSRI)
	110	14	14	Sertraline	SRT	Antidepressant (selective serotonin reuptake inhibitor-SSRI)
	111	15	15	Venlafaxine	VEN	Antidepressant (selective serotonin reuptake inhibitor-SSRI)
	112	16	16	Diazepam	DZP	Antidepressant (benzodiazepine)
	113	17	17	Oxazepam	OZP	Antidepressant (benzodiazepine)
	114	18	18	Desmethyldiazepam	DDZP	Antidepressant (benzodiazepine metabolite)
	115	19	19	Bupropion	BUP	Antidepressant (norepinephrine-dopamine reuptake inhibitor-NDRI)
	116	20	20	Memantine	MEM	Anti-dementia agent (N-methyl-D-aspartate (NMDA) receptor antagonist) (Alzeimer's disease)
	117	21	21	Mirtazapine	MRP	Antidepressant (noradrenergic and selective serotoninergic antidepressants-NaSSA)
	118	22	22	Selegiline	SEL	Antidepressant (monoamine oxidase type B (MAO-B) inhibitors) (Parkinson's disease)
	119	23	23	Trazodone	TRZ	Antidepressant (serotonin antagonist and reuptake inhibitor-SARI)
	120	24	24	Zolpidem	ZPD	Antidepressant (nonbenzodiazepine hypnotic (z-drug))
	121	25	25	m-Chlorophenylpiperazine	MCPZ	Anxiolytic (Serotonergic agonist - piperazine derivative)
				CARDIAC CARE MEDICATIONS
				Antiarrhythmic agents
	122	1	1	Amiodarone	AMD	antiarrhythmic
	123	2	2	Dronedarone	DRN	antiarrhythmic
	124	3	3	Flecainide	FLC	antiarrhythmic
	125	4	4	Lidocaine	LID	antiarrhythmic
	126	5	5	Mexiletine	MXL	antiarrhythmic
	127	6	6	Propafenone	PPF	antiarrhythmic
	128	7	7	Quinidine	QND	antiarrhythmic
	129	8	8	N-desethylamiodarone	N-DAMD	antiarrhythmic (metabolite)
				Antiplatelet (anti-blood clot)
	130	9	1	Clopidogrel	CLP	Antiplatelet
	131	10	2	Clopidogrel Carboxylic Acid	CLP-CA	Antiplatelet (metabolite)
				ANTIHYPERTENSIVES - Angiotensin-converting enzyme (ACE) inhibitor
	132	11	1	Enalapril	ENL	Angiotensin-converting enzyme (ACE) inhibitor
	133	12	2	Enalaprilat	ENT	Angiotensin-converting enzyme (ACE) inhibitor (enalapril active metabolite)
	134	13	3	Ramipril	RMP	Angiotensin-converting enzyme (ACE) inhibitor
	135	14	4	Ramiprilat	RMT	Angiotensin-converting enzyme (ACE) inhibitor
				ANTIHYPERTENSIVES - Angiotensin II receptor blocker (ARB)
	136	15	1	Eprosartan	EPR	Angiotensin II receptor blocker (ARB)
	137	16	2	Irbesartan	IRB	Angiotensin II receptor blocker (ARB)
	138	17	3	Losartan	LOS	Angiotensin II receptor blocker (ARB)
	139	18	4	Telmisartan	TMS	Angiotensin II receptor blocker (ARB)
	140	19	5	Valsartan	VLS	Angiotensin II receptor blocker (ARB)
				β-blockers
	141	20	1	Acebutolol	ACB	β-blocker
	142	21	2	Atenolol	ATN	β-blocker
	143	22	3	Bisoprolol	BSP	β-blocker
	144	23	4	Metoprolol	MTP	β-blocker
	145	24	5	Nadolol	NAD	β-blocker
	146	25	6	Propranolol	PRP	β-blocker
	147	26	7	Sotalol	STL	β-blocker
				Diuretics
	148	27	1	Furosemide	FRS	Diuretic
	149	28	2	Hydrochlorothiazide	HCT	Diuretic
				Calcium channel blockers
	150	29	1	Amlodipine	AML	Calcium Channel blocker
	151	30	2	Diltiazem	DTZ	Calcium Channel blocker
	152	31	3	Verapamil	VRP	Calcium Channel blocker
				ANTIFUNGALS
	153	1	1	Amorolfine	AMO	Antifungals (morpholine)
	154	2	2	Fluconazole	FLZ	Antifungals (azole)
	155	3	3	Ketokonazole	KTZ	Antifungals (imidazole)
	156	4	4	Miconazole	MCZ	Antifungals (imidazole)
				LIPID REGULATORS, ANTHYPERLIPIDEMICS
				Statins
	157	1	1	Atorvastatin	ATV	Lipid regulator
	158	2	2	Pravastatin	PRV	Lipid regulator
	159	3	3	Rosuvastatin	RSV	Lipid regulator
	160	4	4	Simvastatin	SMV	Lipid regulator
				Fibrates
	161	5	1	Bezafibrate	BZF	Lipid regulator
	162	6	2	Clofibric Acid	CLF-A	Lipid regulator
	163	7	3	Fenofibrate	FFB	Lipid regulator
	164	8	4	Fenofibric Acid	FNF-A	Lipid regulator (Fenofibrate active metabolite)
	165	9	5	Gemfibrozil	GMF	Lipid regulator
				ANTIHISTAMINES AND BRONCHODILATORS
	166	1	1	Cimetidine	CIM	Antihistamine (H2 blocker)
	167	2	2	Diphenhydramine	DPD	Antihistamine (H1 receptor antagonist)
	168	3	3	Ranitidine	RNT	Antihistamine (H2 blocker)
	169	4	4	Salbutamol	SAL	Bronchodilator (short-acting B2 agonist-SABA)
	170	5	5	Terbutaline	TBT	Bronchodilator (short-acting B2 agonist-SABA)
				ANTINEOPLASTICS	Anticancer agents
				Alkylating agent
	171	1	1	Cyclophosphamide	CYP	Alkylating agent
				Antimetabolite
	172	2	1	Methotrexate	MTX	Antimetabolite
				Immunosuppressant
	173	3	1	Mycophenolate Mofetil	MPM	Immunosuppressant
	174	4	2	Mycophenolic Acid	MP-A	Immunosuppressant (Mycophenolate Mofetil active metabolite)
				ERECTILE DYSFUNCTION AGENTS
	175	1	1	Sildenafil	SLD	Erectile disfunction agent
	176	2	2	Yohimbine	YOH	Erectile disfunction agent
				X-RAY CONTRAST AGENT	X-ray contrast media
	177	1	1	Iopromide	IOP	X-ray contrast media
				ANTIDIABETICS	Antidiabetics
	178	1	1	Sitagliptin	SIT	Antidiabetics
				ANTIVIROTICS	Antivirotics
	179	1	1	Amantadine	AMN	Antivirotics
	180	2	2	Oseltamivir	OSL	Antivirotics
				MUSCLE RELAXANTS	Muscle relaxants
	181	1	1	Carisoprodol	CRP	Muscle relaxants
	182	2	2	Methocarbamol	MTC	Muscle relaxants
				ANESTHETICS	Anestetics
	183	1	1	Benzocaine	BNZ	Anesthetics
				CHOLINERGIC AND ANTICHOLINERGIC DRUGS
	184	1	1	Pilocarpine	PLC	Cholinergic agonists
	185	2	2	Solifenacin	SLF	Cholinergic antagonists (anticholinergics)
				ANTIHELMINTHICS
	186	1	1	Praziquantel	PRQ	Antihelminthics
				ANTIEMETICS
	187	1	1	Metoclopramide	MCP	Antiemetics
				PHARMACEUTICAL PRODUCTS (PPs) (MALDI-MSI detection)
				NOT CLASSIFIED BY THERAPEUTIC USE
				Matrix-assisted laser desorption ionization mass spectrometry imaging (MALDI-MSI)
				Analyte	CAS RN	Therapeutic classification
	188	1	1	1-(4-Methylpiperazino)-2-[(2-phenylquinoline-4-yl)oxy]ethan-1-one but-2-ene-dioic acid	-
	189	2	2	1-[(3,3-Diphenylpropyl)(methyl)amino]-2-methylpropan-2-ol	100442-33-9
	190	3	3	1-[(4-phenyl-4-piperidyl)carbonyl]pyrrolidine monohydrochloride	83929-36-6
	191	4	4	1-Hydroxymethyltriazolam. alpha-Hydroxy-Triazolam	37115-45-0
	192	5	5	1-Methyl-4-BenzylpiperazineÃ‚Â (MBZP)	62226-74-8
	193	6	6	1-Propanamine, 3-dibenz[b,e]oxepin-11(6H)-ylidene-N-methyl-	1225-56-5
	194	7	7	1-Propanesulfonic acid, 3-(cyclohexylamino)-	1135-40-6
	195	8	8	2-(1-Piperazinyl)-4-amino-6,7-dimethoxyquinazoline	60547-97-9
	196	9	9	2,2-DIPHENYLETHYLAMINE,N,N-DIMETHYL	7647-54-3
	197	10	10	2',3'-Dideoxycytidine	7481-89-2
	198	11	11	2,3-Dihydro-1,4-benzodioxin-2-yl(piperazin-1-yl)methanone	401941-54-6
	199	12	12	2,4(1H,3H)-Pyrimidinedione, 6-(chloromethyl)-	18592-13-7
	200	13	13	2-Amino-N-cyclohexyl-N-methylbenzylamine	57365-08-9
	201	14	14	2-thien-2-ylthiazolidine-4-carboxylic acid	32451-19-7
	202	15	15	3-[(2,6-dichlorophenyl)methylene]-N-hydroxycarbazamidine hydrochloride	23256-40-8
	203	16	16	3-[4-(Trifluoromethoxy)phenyl]acrylic acid	783-13-1
	204	17	17	3-{[(Cyanoimino)(methylthio)methyl]amino}-2-oxoazepane	-
	205	18	18	3-acetoxy-a,a,a-trifluoro-p-toluic acid	322-79-2
	206	19	19	1-(3-methoxybenzyl)piperazine (3-MBZP)	55212-32-3
	207	20	20	4-(methylsulphonyl)-3-nitrobenzoic acid	81029-08-5
	208	21	21	4-amino-5-nitro-o-anisic acid	59338-90-8
	209	22	22	5-(Aminosulphonyl)-2-methoxybenzoyl chloride	52542-44-6
	210	23	23	5,7-Dichloro tryptamine	94850-28-9
	211	24	24	5-hydroxy-4-(hydroxymethyl)-6-methyl-3-pyridylmethyl dihydrogen phosphate	447-05-2
	212	25	25	9-(2-carboxy-4-isothiocyanatophenyl)-3,6-bis(dimethylamino)xanthylium chloride	6749-36-6
	213	26	26	Adenosine	58-61-7
	214	27	27	Adrenalone	99-45-6
	215	28	28	Allopurinol riboside	16220-07-8
	216	29	29	Alprenolol	13655-52-2
	217	30	30	Alypin	963-07-5
	218	31	31	Amiterol	54063-25-1
	219	32	32	Anagrelide	68475-42-3
	220	33	33	Atenolol met 6 - 264	108913-85-5
	221	34	34	Aureothricin	574-95-8
	222	35	35	Azacyclonol	115-46-8
	223	36	36	Baquiloprim	1228182-50-0
	224	37	37	Bazedoxifene	198481-33-3
	225	38	38	Benzodioxolfentanyl	2306823-01-6
	226	39	39	Benzphetamine	156-08-1
	227	40	40	Brofoxine	21440-97-1
	228	41	41	Bromisovalum	496-67-3
	229	42	42	Bucetin	1083-57-4
	230	43	43	Bunitrolol	34915-68-9
	231	44	44	Carzenide	138-41-0
	232	45	45	Cipamfylline	132210-43-6
	233	46	46	Clenbuterol	37148-27-9
	234	47	47	Clidinium	3485-62-9
	235	48	48	Cromophene	16150-45-1
	236	49	49	Cyclopentynafil	1173706-34-7
	237	50	50	Cymiazole	61676-87-7
	238	51	51	Deferoxamine	70-51-9
	239	52	52	Desoxypipradol	519-74-4
	240	53	53	Dexamethasone	50-02-2
	241	54	54	Diethylcarbamazine	90-89-1
	242	55	55	Dimethisoquin	2773-92-4
	243	56	56	Dimyristylamine	17361-44-3
	244	57	57	Dinortramadol	931115-27-4
	245	58	58	Doxylamine	562-10-7
	246	59	59	Epinastine	108929-04-0
	247	60	60	Ethanesulfonic acid, 2-(cyclohexylamino)-	103-47-9
	248	61	61	Etoloxamine	1157-87-5
	249	62	62	Fenpiprane	3540-95-2
	250	63	63	Fluphenazine	69-23-8
	251	64	64	Gallopamil	16662-47-8
	252	65	65	Guanethidine	55-65-2
	253	66	66	Guanosine	81759-48-0
	254	67	67	Hydrocortisone 21-hexanoate	3593-96-2
	255	68	68	Lacosamide	175481-36-4
	256	69	69	Leucylproline	6403-35-6
	257	70	70	Lonazolac	53808-88-1
	258	71	71	l-Tryptophan	54-12-6
	259	72	72	L-Tyrosine	60-18-4
	260	73	73	Mebhydrolin	6153-33-9
	261	74	74	Mebutamate	64-55-1
	262	75	75	Mepivacaine	96-88-8
	263	76	76	Methaqualone	72-44-6
	264	77	77	Methohexital	151-83-7
	265	78	78	Metizolam (Desmethyletizolam)	40054-68-0
	266	79	79	Miglustat	72599-27-0
	267	80	80	N,O-Didesmethylvenlafaxine	135308-74-6
	268	81	81	N-Amidinododecanamide	5634-27-5
	269	82	82	N-desmethyl diltiazem	85100-17-0
	270	83	83	N-desmethylpheniramine	19428-44-5
	271	84	84	N-Nitrosodicyclohexylamine	947-92-2
	272	85	85	Nomifensine	24526-64-5
	273	86	86	Nordiltiazem	-
	274	87	87	Nordoxepin	67035-76-1
	275	88	88	Norvenlafaxine	149289-30-5
	276	89	89	O-Desmethyl Venlafaxine	142761-11-3
	277	90	90	Pamidronic acid	40391-99-9
	278	91	91	Phenallymal	115-43-5
	279	92	92	Pheniramine	86-21-5
	280	93	93	Picric acid	88-89-1
	281	94	94	Prilocaine	721-50-6
	282	95	95	Primaquine	90-34-6
	283	96	96	Propyphenazone	479-92-5
	284	97	97	Proquazone	22760-18-5
	285	98	98	Quinoline, 2-(phenylthio)-	22190-12-1
	286	99	99	Quinupramine	31721-17-2
	287	100	100	Riluzole	1744-22-5
	288	101	101	Rivaroxaban Manuel	366789-02-8
	289	102	102	Rivastigmine	123441-03-2
	290	103	103	Saccharin N-(2-acetic acid ethyl ester)	24683-20-3
	291	104	104	Salvianolic acid A	96574-01-5
	292	105	105	Teoprolol	65184-10-3
	293	106	106	Terfenadine	50679-08-8
	294	107	107	Thiodimethyl Sildenafil	856190-47-1
	295	108	108	Thioridazine	50-52-2
	296	109	109	Tolfenamic acid	13710-19-5
	297	110	110	Tolpropamine	5632-44-0
	298	111	111	Tolycaine	3686-58-6
	299	112	112	Trandolapril	87679-37-6
	300	113	113	Triphenylsilanol	791-31-1
	301	114	114	Zinterol	38241-28-0
				PERSONAL CARE PRODUCTS (PCPs)
				PARABENS AND METABOLITES
				Analyte	Abbreviation	Application and use
	302	1	1	Methyl Paraben	MeP	Preservative
	303	2	2	Ethyl Paraben	EtP	Preservative
	304	3	3	Propyl Paraben	PrP	Preservative
	305	4	4	Isopropyl-paraben	iso-PrP	Preservative
	306	5	5	Butyl Paraben	BuP	Preservative
	307	6	6	Isobutyl-paraben (iso-BuP)	iso-BuP	Preservative
	308	7	7	Heptyl Paraben	HepP	Preservative
	309	8	8	Benzyl Paraben	BzP	Preservative
	310	9	9	Methyl protocatechuate	OH-MeP	Preservative metabolite
	311	10	10	3,4-dihydroxybenzoic acid	3,4-DHB	Preservative metabolite
	312	11	11	4-hydroxybenzoic acid	4-HB	Preservative metabolite
	313	12	12	Ethyl protocatechuate	OH-EtP	Preservative metabolite
				ANTIMICROBIALS AND METABOLITES
	314	13	1	Triclosan (Irgasan)	TCS	Antimicrobial
	315	14	2	Triclocarban	TCC	Antimicrobial
	316	15	3	2′-hydroxy-triclocarban	2'-OH-TCC	Antimicrobial metabolite
	317	16	4	3′-hydroxy-triclocarban	3'-OH-TCC	Antimicrobial metabolite
	318	17	5	Carbanilide	CBN	Antimicrobial metabolite
	319	18	6	Monocarbanilide	MCC	Antimicrobial metabolite
	320	19	7	Dichlorocarbanilide	DCC	Antimicrobial metabolite
	321	20	8	3,3′,4,4′-tetrachlorocarbanilide	TCCC	Antimicrobial metabolite
				HORMONES
				NATURAL HORMONES
				Analyte	Abbreviation	Hormone category and application
	322	1	1	Androstenedione	A4	Natural (androgen)
	323	2	2	Androsterone	AN	Natural (androgen)
	324	3	3	Cortisone	E	Natural and synthetic (corticosteroid)
	325	4	4	Estrone	E1	Natural (estrogen)
	326	5	5	17 β-estradiol	E2 (17 β-E2)	Natural (estrogen)
	327	6	6	17 α-estradiol	17 α-E2	Natural (estrogen)
	328	7	7	Estriol	E3	Natural (estrogen)
	329	8	8	Progesterone	P	Natural (progestogen)
	330	9	9	Testosterone	T	Natural (androgen)
	331	10	10	Equilin	EQL	Natural (equine estrogen) - hormone replacement therapy (HRT)
	332	11	11	Equilenin	EQN	Natural (equine estrogen) - hormone replacement therapy (HRT)
				NATURAL HORMONES
	333	12	1	17 α-ethinylestradiol	EE2	Synthetic (estrogen)
	334	13	2	Allyl Trenbolone / Altrenogest	ALT	Synthetic (progestogen)
	335	14	3	Desogestrel	DSG	Synthetic (progestogen)
	336	15	4	Diethylstilbestrol	DES	Synthetic (estrogen)
	337	16	5	Gestodene	GST	Synthetic (progestogen)
	338	17	6	Melengestrol Acetate	MGA	Synthetic (progestogen)
	339	18	7	Mestranol	EEME	Synthetic (estrogen)
	340	19	8	Norethindrone	NRT	Synthetic (progestogen)
	341	20	9	Norgestrel	NRG	Synthetic (progestogen)
	342	21	10	17 α-dihydroequilin	2H-EQL	Synthetic (equine estrogen) - hormone replacement therapy (HRT)
				PLASCTICIZERS
				BISPHENOLS (BPs)
				Analyte	Abbreviation	Application and use
	343	1	1	Bisphenol A	BPA	Polycarbonate and epoxy resins plasticizer
	344	2	2	Bisphenol AF	BPAF	Polycarbonate and epoxy resins plasticizer
	345	3	3	Bisphenol AP	BPAP	Polycarbonate and epoxy resins plasticizer
	346	4	4	Bisphenol B	BPB	Polycarbonate and epoxy resins plasticizer
	347	5	5	Bisphenol BPBP	BPBP	Polycarbonate and epoxy resins plasticizer
	348	6	6	Bisphenol C	BPC	Polycarbonate and epoxy resins plasticizer
	349	7	7	Bisphenol CI	BPCI	Polycarbonate and epoxy resins plasticizer
	350	8	8	Bisphenol E	BPE	Polycarbonate and epoxy resins plasticizer
	351	9	9	Bisphenol F	BPF	Polycarbonate and epoxy resins plasticizer
	352	10	10	Bisphenol FL	BPFL	Polycarbonate and epoxy resins plasticizer
	353	11	11	Bisphenol G	BPG	Polycarbonate and epoxy resins plasticizer
	354	12	12	Bisphenol M	BPM	Polycarbonate and epoxy resins plasticizer
	355	13	13	Bisphenol P	BPP	Polycarbonate and epoxy resins plasticizer
	356	14	14	Bisphenol PH	BPPH	Polycarbonate and epoxy resins plasticizer
	357	15	15	Bisphenol S	BPS	Polycarbonate and epoxy resins plasticizer
	358	16	16	Bisphenol TMC	BP-TMC	Polycarbonate and epoxy resins plasticizer
	359	17	17	Bisphenol Z	BPZ	Polycarbonate and epoxy resins plasticizer
	360	18	18	Tetrabromobisphenol A	TBBPA	Polycarbonate and epoxy resins plasticizer
	361	19	19	Tetrachlorobisphenol A	TCBPA	Polycarbonate and epoxy resins plasticizer
	362	20	20	Tetrabromobisphenol S	TBBPS	Polycarbonate and epoxy resins plasticizer
				PHTHALIC ACID ESTERS (PAEs)
	363	21	1	Dimethyl phthalate	DMP	Polyvinyl chloride (PVC) plasticizer, cosmetic and fragrance additives
	364	22	2	Diethylphthalate	DEP	Polyvinyl chloride (PVC) plasticizer, cosmetic and fragrance additives
	365	23	3	Dibutyl phthalate	DBP	Polyvinyl chloride (PVC) plasticizer, cosmetic and fragrance additives
	366	24	4	Diisobutyl phthalate	DiBP	Polyvinyl chloride (PVC) plasticizer, cosmetic and fragrance additives
	367	25	5	Di(2-ethoxyethyl) phthalate	DEEP	Polyvinyl chloride (PVC) plasticizer, cosmetic and fragrance additives
	368	26	6	Di-n-hexyl phthalate	DHP	Polyvinyl chloride (PVC) plasticizer, cosmetic and fragrance additives
	369	27	7	Butylbenzyl phthalate	BBzP	Polyvinyl chloride (PVC) plasticizer, cosmetic and fragrance additives
	370	28	8	Di(hexyl-2-ethylhexyl)phthalate	DHEHP	Polyvinyl chloride (PVC) plasticizer, cosmetic and fragrance additives
	371	29	9	Di(2-butoxyethyl) phthalate	DBEP	Polyvinyl chloride (PVC) plasticizer, cosmetic and fragrance additives
	372	30	10	Bis(2-ethylhexyl) phthalate	DEHP	Polyvinyl chloride (PVC) plasticizer, cosmetic and fragrance additives
	373	31	11	Di-n-octyl phthalate	DOP	Polyvinyl chloride (PVC) plasticizer, cosmetic and fragrance additives
	374	32	12	Di-n-nonyl phthalate	DNP	Polyvinyl chloride (PVC) plasticizer, cosmetic and fragrance additives
	375	33	13	Diisononyl phthalate	DiNP	Polyvinyl chloride (PVC) plasticizer, cosmetic and fragrance additives
	376	34	14	Diisodecyl phthalate	DiDP	Polyvinyl chloride (PVC) plasticizer, cosmetic and fragrance additives
	377	35	15	Bis(2-methoxyethyl) phthalate	DMEP	Polyvinyl chloride (PVC) plasticizer, cosmetic and fragrance additives
				RUBBER AND POLYMER ANTIOXIDANTS (AROMATIC SECONDARY AMINES - Ar-SAs)
				SUBSTITUTED DIPHENYLAMINES (S-DPAs)
				Analyte	Abbreviation	Application
	378	1	1	Diphenylamine	DPA	Industrial antioxidants in petroleum-based products, rubber or polymeric materials
	379	2	2	Isopropyl-diphenylamine	IP-DPA	Industrial antioxidants in petroleum-based products, rubber or polymeric materials
	380	3	3	Dimethyl-acridan	DM-AD	Industrial antioxidants in petroleum-based products, rubber or polymeric materials
	381	4	4	Isopropyl-dimethyl-acridine	IPDM-AD	Industrial antioxidants in petroleum-based products, rubber or polymeric materials
	382	5	5	Diisopropyl-diphenylamine	DIP-DPA	Industrial antioxidants in petroleum-based products, rubber or polymeric materials
	383	6	6	Diisopropyl-dimethyl-acridine	DIPDM-AD	Industrial antioxidants in petroleum-based products, rubber or polymeric materials
	384	7	7	Styrenated diphenylamine	S-DPA1	Industrial antioxidants in petroleum-based products, rubber or polymeric materials
	385	8	8	Styrenated diphenylamine	S-DPA2	Industrial antioxidants in petroleum-based products, rubber or polymeric materials
	386	9	9	Isooctyl-diphenylamine	TO-DPA	Industrial antioxidants in petroleum-based products, rubber or polymeric materials
	387	10	10	Isooctyl-styrenated diphenylamine	TOS-DPA1	Industrial antioxidants in petroleum-based products, rubber or polymeric materials
	388	11	11	Isooctyl-styrenated diphenylamine	TOS-DPA2	Industrial antioxidants in petroleum-based products, rubber or polymeric materials
	389	12	12	Isooctyl-styrenated diphenylamine	DTOS-DPA3	Industrial antioxidants in petroleum-based products, rubber or polymeric materials
	390	13	13	Diisooctyl-styrenated diphenylamine	DTOS-DPA	Industrial antioxidants in petroleum-based products, rubber or polymeric materials
	391	14	14	Diisooctyl-diphenylamine	DTO-DPA	Industrial antioxidants in petroleum-based products, rubber or polymeric materials
	392	15	15	Dicyclohexylamine	DChA	Antioxidants
	393	16	16	N-phenyl-1-naphthylamine	AO-A	Antioxidants
	394	17	17	N-phenyl-2-naphthylamine	AO-D	Antioxidants
	395	18	18	4,4'-di-tert-butyldiphenylamine	di-t-bu-DPA	Antioxidants
	396	19	19	4,4′-di-n-octylphenylamine	di-n-oc-DPA	Antioxidants
	397	20	20	4,4′-bis(1,1-dimethylbenzyl)diphenylamine	diAMS	Antioxidants
				SUBSTITUTED p-PHENYLENEDIAMINES (S-PPDs)
	398	21	1	N-(1,4-dimethylpentyl)-N′-phenylbenzene-1,4-diamine	77PD	Rubber antioxidants, anti-ozonolysis, and bending crack inhibitors
	399	22	2	N-isopropyl-N′-phenyl-p-phenylenediamine	IPPD	Rubber antioxidants, anti-ozonolysis, and bending crack inhibitors
	400	23	3	N-phenyl-N′-cyclohexyl-p-phenylenediamine	CPPD	Rubber antioxidants, anti-ozonolysis, and bending crack inhibitors
	401	24	4	N-(1.3-dimethylbutyl)-N′-phenyl-p-phenylenediamine	6PPD	Rubber antioxidants, anti-ozonolysis, and bending crack inhibitors
	402	25	5	N,N′-diphenyl-p-phenylenediamine	DPPD	Rubber antioxidants, anti-ozonolysis, and bending crack inhibitors
	403	26	6	N-phenyl-N′-(o-tolyl)-p-phenylenediamine	PTPD	Rubber antioxidants, anti-ozonolysis, and bending crack inhibitors
	404	27	7	N,N′-di(o-tolyl)-p-phenylenediamine	DTPD	Rubber antioxidants, anti-ozonolysis, and bending crack inhibitors
	405	28	8	N,N′-di-2-naphthyl-p-phenylenediamine	DNPD	Rubber antioxidants, anti-ozonolysis, and bending crack inhibitors
	406	29	9	N-isopropyl-N′-phenyl-1,4-phenylenediamine-quinone	IPPD-Q	Rubber antioxidants, anti-ozonolysis, and bending crack inhibitors
	407	30	10	N-phenylN′-cyclohexyl-p-phenylenediamine-quinone	CPPD-Q	Rubber antioxidants, anti-ozonolysis, and bending crack inhibitors
	408	31	11	N-(1,3-dimethylbutyl)-N′-phenyl-p-phenylenediamine-quinone	6PPD-Q	Rubber antioxidants, anti-ozonolysis, and bending crack inhibitors
	409	32	12	N,N′-diphenyl-p-phenylenediamine-quinone	DPPD-Q	Rubber antioxidants, anti-ozonolysis, and bending crack inhibitors
	410	33	13	N,N′-di(o-tolyl)-p-phenylenediamine-quinone	DTPD-Q	Rubber antioxidants, anti-ozonolysis, and bending crack inhibitors
				PESTICIDES
				NEONICOTINOID INSECTICIDES
				Analyte	Abbreviation	Application
	411	1	1	Imidacloprid	IMI	Neonicotinoid insecticide
	412	2	2	Thiamethoxam	TMX	Neonicotinoid insecticide
	413	3	3	Clothianidin	CLT	Neonicotinoid insecticide
	414	4	4	Acetamiprid	ACT	Neonicotinoid insecticide
	415	5	5	Thiacloprid	TCP	Neonicotinoid insecticide
	416	6	6	Dinotefuran	DNT	Neonicotinoid insecticide
	417	7	7	Nitenpyram	NTP	Neonicotinoid insecticide
	418	8	8	Imidaclothiz	IMC	Neonicotinoid insecticide
	419	9	9	Flonicamid	FLN	Neonicotinoid insecticide

## Sheet: Sheet 3-PPs
				Reference number				1	1	1	1	1	3	3	4	1	1	8	8	8	9	13	13	14	14	14	15	15	12	12	12	12	12	12	12	12	12	12	12	12	12	12	18	18	18		Statistics
				Chromatographic separation (GC or LC)				UPLC	UPLC	UPLC	UPLC	UPLC	HPLC	HPLC	LC	LC	LC				HPLC	UPLC	UPLC	UHPLC	UHPLC	UHPLC	GC	GC	UPLC	UPLC	UPLC	UPLC	UPLC	UPLC	UPLC	UPLC	UPLC	UPLC	UPLC	UPLC	UPLC	UPLC	HPLC	HPLC	HPLC
				Extraction technique (SPE, dSPE)				ASE	ASE	ASE	ASE	ASE	ASE	ASE	ASE	QuEChERS	QuEChERS	QuECHERS	QuECHERS	QuECHERS		Espresso & PHWE	Espresso & PHWE	QuEChERS	QuEChERS	QuEChERS	MAE (Microwave-Assisted Extraction)	MAE (Microwave-Assisted Extraction)	Matrix solidphase dispersion (MSPD)	Matrix solidphase dispersion (MSPD)	Matrix solidphase dispersion (MSPD)	Matrix solidphase dispersion (MSPD)	Matrix solidphase dispersion (MSPD)	Matrix solidphase dispersion (MSPD)	Matrix solidphase dispersion (MSPD)	Matrix solidphase dispersion (MSPD)	Matrix solidphase dispersion (MSPD)	Matrix solidphase dispersion (MSPD)	Matrix solidphase dispersion (MSPD)	Matrix solidphase dispersion (MSPD)	Matrix solidphase dispersion (MSPD)	Matrix solidphase dispersion (MSPD)
				Cleanup				SPE	SPE	SPE	SPE	SPE	SPE	SPE	Not used	SPE	SPE	SPE	SPE	SPE				SPE	SPE	SPE	d-SPE	d-SPE	PTFE filtration	PTFE filtration	PTFE filtration	PTFE filtration	PTFE filtration	PTFE filtration	PTFE filtration	PTFE filtration	PTFE filtration	PTFE filtration	PTFE filtration	PTFE filtration	PTFE filtration	PTFE filtration
				Analysis				MS/MS	MS/MS	MS/MS	MS/MS	MS/MS	MS/MS	MS/MS	MS/MS	MS/MS	MS/MS	UHPLC	UHPLC	UHPLC				Q-TOF	Q-TOF	Q-TOF	MS/MS	MS/MS	MS/MS	MS/MS	MS/MS	MS/MS	MS/MS	MS/MS	MS/MS	MS/MS	MS/MS	MS/MS	MS/MS	MS/MS	MS/MS	MS/MS	PDA	PDA	PDA
				Matrix				Sewage sludge	Sewage sludge	Sewage sludge	Sewage sludge	Sewage sludge	Sewage sludge	Sewage sludge	Sewage sludge	Sewage sludge	Sewage sludge	Limed sludge	Digested sludge	Composted sludge	Composted sludge	Sewage slufge	Sewage sludge	Sludge	Sludge	Sludge	Sewage sludge	Sewage sludge	Sewage sludge	Sewage sludge	Sewage sludge	Sewage sludge	Sewage sludge	Sewage sludge	Sewage sludge	Sewage sludge	Sewage sludge	Sewage sludge	Sewage sludge	Sewage sludge	Sewage sludge	Sewage sludge	sludge	sludge	sludge		Sewage sludge
				Unit				Lisbon 1 (median)	Lisbon 2 (median)	Lisbon 3 (median)	Faro 1 (median)	Faro 2 (median)	Winter occurrence in SS (ng g-1)	Summer occurrence in SS (ng g-1)	Sewage sludge	Mean (in 8 WWTP)	Median (in 8 WWTP)				Occurrence (ng g-1)	Espresso (n=3) µg/kg	Pressurized Hot Water Extraction (PHWE) (n=3) µg/kg		Mesophilic (µg kg- 1d.w.)	Thermophilic (µg kg- 1d.w.)	Thickened-Mixed Sludge Influent (TMSI)	Anaerobically-Digested Thickened-Mixed Sludge Effluent ADTMSE)	conc (ng g-1)	conc (ng g-1)	conc (ng g-1)	conc (ng g-1)	conc (ng g-1)	conc (ng g-1)	conc (ng g-1)	conc (ng g-1)	conc (ng g-1)	conc (ng g-1)	conc (ng g-1)	conc (ng g-1)	conc (ng g-1)	conc (ng g-1)	Min conc (ng/g)	Max conc (ng/g)	Mean (ng/g)		Min (ng/g)	Median (ng/g)	Mean (ng/g)
				PHARMACEUTICAL PRODUCTS (PPs)
				ANALGESICS
				Nonnarcotic analgesics, antipyretics, or NSAIDs and metabolites
				Analyte	Abbreviation	Therapeutic group
	1	1	1	Acetaminophen / Paracetamol	APAP	Nonnarcotic analgesic, antipyretic, NSAID or metabolite		11.6	16.7	15.1	6.23	10.5	˂LOQ	˂LOQ								34	29																								6.23	15.1	17.59
	2	2	2	Diclofenac	DCF	Nonnarcotic analgesic, antipyretic, NSAID or metabolite		35.6	28.7	33.3	28.9	29	471	167	10.2			1620	803	37	8.9	18	24				250	194																			8.9	34.45	234.912
	3	3	3	Diflunisal	DFS	Nonnarcotic analgesic, antipyretic, NSAID or metabolite																																									0	n.a.	n.a.
	4	4	4	Ethenzamide	ETH	Nonnarcotic analgesic, antipyretic, NSAID or metabolite																																									0	n.a.	n.a.
	5	5	5	Flurbiprofen	FLB	Nonnarcotic analgesic, antipyretic, NSAID or metabolite																																									0	n.a.	n.a.
	6	6	6	Ibuprofen	IBU	Nonnarcotic analgesic, antipyretic, NSAID or metabolite		73.1	12.9	13	8.16	8.25	37.2	47.4	51.7						˂LOD						105	48																			8.16	42.3	40.471
	7	7	7	Indometacin	IND	Nonnarcotic analgesic, antipyretic, NSAID or metabolite																																									0	n.a.	n.a.
	8	8	8	Ketoprofen	KTP	Nonnarcotic analgesic, antipyretic, NSAID or metabolite							10.1	11.6																																	10.1	10.85	10.85
	9	9	9	Nalbuphine	NLB	Nonnarcotic analgesic, antipyretic, NSAID or metabolite																																									0	n.a.	n.a.
	10	10	10	Naproxen	NPX	Nonnarcotic analgesic, antipyretic, NSAID or metabolite		52.8	4.16	4.1	4.53	4.12	7.76	8.3								9.3	8.1				8332	9355																			4.1	8.1	1617.29
	11	11	11	Phenacetin	PCT	Nonnarcotic analgesic, antipyretic, NSAID or metabolite																																									0	n.a.	n.a.
	12	12	12	Salicylic acid	SA	Nonnarcotic analgesic, antipyretic, NSAID or metabolite																					2695	< MLQ																			2695	2695	2695
	13	13	13	4-hydroxydiclofenac	4H-DCF	Nonnarcotic analgesic, antipyretic, NSAID or metabolite															˂LOD																										0	n.a.	n.a.
	14	14	14	Carboxyibuprofen	C-IBU	Nonnarcotic analgesic, antipyretic, NSAID or metabolite															˂LOD																										0	n.a.	n.a.
	15	15	15	1-hydroxyibuprofen	1H-IBU	Nonnarcotic analgesic, antipyretic, NSAID or metabolite															˂LOD																										0	n.a.	n.a.
	16	16	16	2-hydroxyibuprofen	2H-IBU	Nonnarcotic analgesic, antipyretic, NSAID or metabolite															˂LOD																										0	n.a.	n.a.
				Opioid (narcotic) analgesics, stimulants and metabolites
	17	17	1	Caffeine (1,3,7-trimethylxanthine)	CAF	Stimulant		598	87.7	76.8	62.8	64.7			3.1						45																						24	1620	822		3.1	70.75	340.41
	18	18	2	Codeine	COD	Opioid (narcotic) analgesic																			<MDL	<MQL																					0	n.a.	n.a.
	19	19	3	Naloxone	NLX	Opioid agonist																																									0	n.a.	n.a.
	20	20	4	Tramadol	TRM	Opioid (narcotic) analgesic																10	11																								10	10.5	10.5
	21	21	5	Varenicline	VRN	Nicotinic agonist																																									0	n.a.	n.a.
	22	22	6	N-desmethyltramadol	DT-TRM	Opioid (narcotic) analgesic																																									0	n.a.	n.a.
	23	23	7	Paraxanthine (1,7-dimethylxanthine)	PAX	Stimulant metabolite															22																										22	22	22
				Total 12 analgesics																																											2767.59	2909.05	4989.02
				ANTIBIOTICS	Antibiotics
				Sulfonamides and potentiators
	24	1	1	Sulfacetamide	SCT	Sulfonamide antibiotic																																									0	n.a.	n.a.
	25	2	2	Sulfachloropyridazine	SCP	Sulfonamide antibiotic																																									0	n.a.	n.a.
	26	3	3	Sulfadiazine	SDZ	Sulfonamide antibiotic					NG	NG						˂LOD	˂LOD	˂LOD																											0	n.a.	n.a.
	27	4	4	Sulfadimethoxine	SDM	Sulfonamide antibiotic																																									0	n.a.	n.a.
	28	5	5	Sulfadimidine/sulfamethazine	SMTZ	Sulfonamide antibiotic																																									0	n.a.	n.a.
	29	6	6	Sulfadoxine	SDX	Sulfonamide antibiotic																																									0	n.a.	n.a.
	30	7	7	Sulfaguanidine	SGD	Sulfonamide antibiotic																																									0	n.a.	n.a.
	31	8	8	Sulfamerazine	SMR	Sulfonamide antibiotic																																									0	n.a.	n.a.
	32	9	9	Sulfameter	SMT	Sulfonamide antibiotic																																									0	n.a.	n.a.
	33	10	10	Sulfamethizole	SMZ	Sulfonamide antibiotic																																									0	n.a.	n.a.
	34	11	11	Sulfamethoxazole	SMX	Sulfonamide antibiotic		5.59	10.9	9.51	3.9	8.97	13.4	7.1				˂LOD	˂LOD	˂LOD	˂LOD	n.d	n.d																								3.9	8.97	8.48143
	35	12	12	Sulfamethoxypyridazine	SMP	Sulfonamide antibiotic												˂LOD	˂LOD	˂LOD																											0	n.a.	n.a.
	36	13	13	Sulfamonomethoxine	SMM	Sulfonamide antibiotic																																									0	n.a.	n.a.
	37	14	14	Sulfapyridine	SPY	Sulfonamide antibiotic (veterinary)		8.4	18.5	19.3	4.59	7.01																																			4.59	8.4	11.56
	38	15	15	Sulfaquinoxaline Na	SQX	Sulfonamide antibiotic (veterinary)																																									0	n.a.	n.a.
	39	16	16	Sulfathiazole	STZ	Sulfonamide antibiotic																																									0	n.a.	n.a.
	40	17	17	N-acetylsulfamethoxazole	A-SMX	Sulfonamide antibiotic metabolite															˂LOQ																										0	n.a.	n.a.
	41	18	18	Ormetoprim	OMP	Sulfonamide potentiator																																									0	n.a.	n.a.
	42	19	19	Trimethoprim	TMP	Sulfonamide potentiator												477	84	˂LOD		0.2	1.2																								0.2	42.6	140.6
				Quinolones and fluoroquinolones
	43	20	1	Ciprofoxacin	CPF	Fluoroquinolone antibiotic							3753	4889				1970	722	65		60	303																								60	722	1680.29
	44	21	2	Danofloxacin mesylate	DNF-M	Fluoroquinolone antibiotic (veterinary)																																									0	n.a.	n.a.
	45	22	3	Decoquinate	DCQ	Quinolone antibiotic																																									0	n.a.	n.a.
	46	23	4	Enrofloxacin	ENF	Fluoroquinolone antibiotic (veterinary)																																									0	n.a.	n.a.
	47	24	5	Flumequine	FMQ	Fluoroquinolone antibiotic																																									0	n.a.	n.a.
	48	25	6	Levofloxacin	LVF	Fluoroquinolone antibiotic																																									0	n.a.	n.a.
	49	26	7	Lomefloxacin	LMF	Fluoroquinolone antibiotic																																									0	n.a.	n.a.
	50	27	8	Nalidixic acid	NAL-A	Fluoroquinolone antibiotic																																									0	n.a.	n.a.
	51	28	9	Norfloxacin	NRF	Fluoroquinolone antibiotic												3359	456	55																											55	456	1290
	52	29	10	Ofloxacin	OFL	Fluoroquinolone antibiotic							4673	4126																																	4126	4399.5	4399.5
	53	30	11	Oxolinic acid	OXO-A	Quinolone antibiotic (aquaculture)																																									0	n.a.	n.a.
	54	31	12	Sarafloxacin	SRF	Fluoroquinolone antibiotic																																									0	n.a.	n.a.
				β-lactam antibiotics and metabolites
	55	32	1	Amoxicillin	AMX	β-lactam antibiotic (penicillin)																																									0	n.a.	n.a.
	56	33	2	Ampicillin	AMP	β-lactam antibiotic (penicillin)																																									0	n.a.	n.a.
	57	34	3	Cefapirin	CFP	β-lactam antibiotic (cephalosporin)																																									0	n.a.	n.a.
	58	35	4	Cefazolin	CFZ	β-lactam antibiotic (cephalosporin)							˂LOQ	˂LOQ																																	0	n.a.	n.a.
	59	36	5	Cefotaxime acid	CEF-A	β-lactam antibiotic (cephalosporin)																																									0	n.a.	n.a.
	60	37	6	Cefoxitin sodium salt	CFX-Na	β-lactam antibiotic (cephalosporin)																																									0	n.a.	n.a.
	61	38	7	Cefprozil	CPR	β-lactam antibiotic (cephalosporin)																																									0	n.a.	n.a.
	62	39	8	Cefquinome	CQM	β-lactam antibiotic (cephalosporin)										23.45	15.15																														15.15	19.3	19.3
	63	40	9	Ceftiofur	CFT	β-lactam antibiotic (cephalosporin) (veterinary)																																									0	n.a.	n.a.
	64	41	10	Cephalexin	CPX	β-lactam antibiotic (cephalosporin)																																									0	n.a.	n.a.
	65	42	11	Cloxacillin	CLX	β-lactam antibiotic (penicillin)																																									0	n.a.	n.a.
	66	43	12	Amoxicillin-Diketopiperazine	AMX-DKP	β-lactam antibiotic (penicillin) metabolite										5.25	4.25																														4.25	4.75	4.75
				Macrolides
	67	44	1	Azithromycin	AZI	Macrolide antibiotic																			<MDL	<MDL																					0	n.a.	n.a.
	68	45	2	Clarithromycin	CLR	Macrolide antibiotic							35.9	6.8								1.4	8.5		<MDL	<MDL																					1.4	7.65	13.15
	69	46	3	Erythromycin	ERY	Macrolide antibiotic		28.3	4.19	6.87	7.61	5.16										4.8	5.7																								4.19	5.7	8.94714
	70	47	4	Roxithromycin	ROX	Macrolide antibiotic																																									0	n.a.	n.a.
	71	48	5	Spiramycin	SPR	Macrolide antibiotic																																									0	n.a.	n.a.
	72	49	6	Tilmicosin	TLM	Macrolide antibiotic																																									0	n.a.	n.a.
	73	50	7	Tylosin	TYL	Macrolide antibiotic												˂LOD	˂LOD	˂LOD																											0	n.a.	n.a.
	74	51	8	Vancomycin	VAN	Macrolide antibiotic							83.3	136.3																																	83.3	109.8	109.8
	75	52	9	Dehydro-erythromycin	2H-ERY	Macrolide antibiotic metabolite							1.1	˂LOQ																																	1.1	1.1	1.1
				Tetracyclines
	76	53	1	Tetracycline	TC	Tetracycline antibiotic																																									0	n.a.	n.a.
	77	54	2	Oxytetracycline	OTC	Tetracycline antibiotic																																									0	n.a.	n.a.
	78	55	3	Chlortetracycline	CTC	Tetracycline antibiotic																																									0	n.a.	n.a.
				Nitroimidazole
	79	56	1	Metronidazole	MTZ	Nitroimidazole																																									0	n.a.	n.a.
				Lincosamides
	80	57	1	Clindamycin	CLI	Lincosamide																																									0	n.a.	n.a.
	81	58	2	Lincomycin	LIN	Lincosamide							1.9	1.2																																	1.2	1.55	1.55
				Nitrofurans
	82	59	1	Furazolidone	FZD	Nitrofuran (veterinary)																																									0	n.a.	n.a.
				Oxazolidinones
	83	60	1	3-(2-nitrobenzylidenamino-)-2-oxazolidinone	NB-OXD	Oxazolidinone antibiotic (precursor)																																									0	n.a.	n.a.
				Ionophores
	84	61	1	Maduramicin	MDR	Ionophore antibiotic (veterinary)																																									0	n.a.	n.a.
				Total 23 antibiotics																																											4360.28	5787.32	7689.02
				ANTICONVULSANTS AND ANTIEPILEPTICS
	85	1	1	Carbamazepine	CBZ	Anticonvulsant and antiepileptic		21.4	25.9	26.6	21.8	25.5	23.7	19.7	15.4			193	224	112	2.6	43	52		60	270																					2.6	26.25	71.0375
	86	2	2	Gabapentin	GAB	Anticonvulsant and antiepileptic																																									0	n.a.	n.a.
	87	3	3	Lamotrigine	LAM	Anticonvulsant and antiepileptic																			<MQL	75																					75	75	75
	88	4	4	Levetiracetam	LVT	Anticonvulsant and antiepileptic																																									0	n.a.	n.a.
	89	5	5	Primidone	PRI	Anticonvulsant and antiepileptic																																									0	n.a.	n.a.
	90	6	6	Topiramate	TOP	Anticonvulsant and antiepileptic																																									0	n.a.	n.a.
	91	7	7	Valproic acid	VAL-A	Anticonvulsant and antiepileptic																																									0	n.a.	n.a.
	92	8	8	Carbamazepine-10,11-epoxide	CBZ-O	Anticonvulsant and antiepileptic (metabolite)															˂LOQ																										0	n.a.	n.a.
	93	9	9	3- hydroxycarbamazepine	3-OH-CBZ	Anticonvulsant and antiepileptic (metabolite)															˂LOD																										0	n.a.	n.a.
	94	10	10	10,11-Dihydro-10-hydroxycarbamazepine	2H-OH-CBZ	Anticonvulsant and antiepileptic (metabolite)																																									0	n.a.	n.a.
	95	11	11	10,11-Dihydro-10,11-dihydroxy carbamazepine	2H-2OH-CBZ	Anticonvulsant and antiepileptic (metabolite)							7.5	7.4																																	7.4	7.45	7.45
	96	12	12	Lamotrigine 2-N-glucuronide	LMT-GLC	Anticonvulsant and antiepileptic (metabolite)																																									0	n.a.	n.a.
				Total 12 anticonvulsants and antiepileptics																																											85	108.7	153.487
				ANTIDEPRESSANTS, ANTIPSYCHOTICS, AND ANXIOLYTICS
	97	1	1	Amisulpride	AMS	Atypical antipsychotic																																									0	n.a.	n.a.
	98	2	2	Clozapine	CLZ	Atypical antipsychotic																																									0	n.a.	n.a.
	99	3	3	Quetiapine	QTP	Atypical antipsychotic																																									0	n.a.	n.a.
	100	4	4	Norquetiapine	NRQ	Atypical antipsychotic (quetiapine metabolite)																																									0	n.a.	n.a.
	101	5	5	Sulpiride	SLP	Atypical antipsychotic																																									0	n.a.	n.a.
	102	6	6	Chlorprothixene	CPT	Typical antipsychotic																																									0	n.a.	n.a.
	103	7	7	Amitriptyline	AMT	Tricyclic antidepressant (TCA)									0.1										<MQL	<MQL																	90	1980	1035		0.1	562.5	776.275
	104	8	8	Clomipramine	CLO	Tricyclic antidepressant (TCA)																																									0	n.a.	n.a.
	105	9	9	Dosulepin	DSL	Tricyclic antidepressant (TCA)									0.1																																0.1	0.1	0.1
	106	10	10	Nortriptyline	NOR	Tricyclic antidepressant (TCA)																																									0	n.a.	n.a.
	107	11	11	Citalopram	CIT	Antidepressant (selective serotonin reuptake inhibitor-SSRI)																233	958		510	300																	40	1180	610		40	510	547.286
	108	12	12	Fluoxetine	FLX	Antidepressant (selective serotonin reuptake inhibitor-SSRI)		38.4	5.44	15.3	15.2	13.7																															100	620	360		5.44	26.85	146.005
	109	13	13	Paroxetine	PRX	Antidepressant (selective serotonin reuptake inhibitor-SSRI)							23.5	22.9																																	22.9	23.2	23.2
	110	14	14	Sertraline	SRT	Antidepressant (selective serotonin reuptake inhibitor-SSRI)																																					160	1400	780		160	780	780
	111	15	15	Venlafaxine	VEN	Antidepressant (selective serotonin reuptake inhibitor-SSRI)																219	269		110	190																	90	620	355		90	219	264.714
	112	16	16	Diazepam	DZP	Antidepressant (benzodiazepine)							21.6	7.1																																	7.1	14.35	14.35
	113	17	17	Oxazepam	OZP	Antidepressant (benzodiazepine)																22	27		<MDL	<MDL																					22	24.5	24.5
	114	18	18	Desmethyldiazepam	DDZP	Antidepressant (benzodiazepine metabolite)							29.9	12																																	12	20.95	20.95
	115	19	19	Bupropion	BUP	Antidepressant (norepinephrine-dopamine reuptake inhibitor-NDRI)																																									0	n.a.	n.a.
	116	20	20	Memantine	MEM	Anti-dementia agent (N-methyl-D-aspartate (NMDA) receptor antagonist) (Alzeimer's disease)																																									0	n.a.	n.a.
	117	21	21	Mirtazapine	MRP	Antidepressant (noradrenergic and selective serotoninergic antidepressants-NaSSA)																																									0	n.a.	n.a.
	118	22	22	Selegiline	SEL	Antidepressant (monoamine oxidase type B (MAO-B) inhibitors) (Parkinson's disease)																																									0	n.a.	n.a.
	119	23	23	Trazodone	TRZ	Antidepressant (serotonin antagonist and reuptake inhibitor-SARI)																																									0	n.a.	n.a.
	120	24	24	Zolpidem	ZPD	Antidepressant (nonbenzodiazepine hypnotic (z-drug))																8.4	11																								8.4	9.7	9.7
	121	25	25	m-Chlorophenylpiperazine	MCPZ	Anxiolytic (Serotonergic agonist - piperazine derivative)																																									0	n.a.	n.a.
				Total antidepressants, antipsychotics, and antianxiety																																											368.04	2191.15	2607.08
				CARDIAC CARE MEDICATIONS
				Antiarrhythmic agents
	122	1	1	Amiodarone	AMD	antiarrhythmic																							263	103	40	76	53	296	99	110	191	99	233	392	180	241					40	145	169.714
	123	2	2	Dronedarone	DRN	antiarrhythmic																							287	6	4	23	5	732	n.d.	9	141	21	150	<LOQ	71	n.d.					4	23	131.727
	124	3	3	Flecainide	FLC	antiarrhythmic																							43	49	11	11	17	15	27	22	33	12	8	26	21	10					8	19	21.7857
	125	4	4	Lidocaine	LID	antiarrhythmic																			<MDL	<MQL																					0	n.a.	n.a.
	126	5	5	Mexiletine	MXL	antiarrhythmic																																									0	n.a.	n.a.
	127	6	6	Propafenone	PPF	antiarrhythmic																																									0	n.a.	n.a.
	128	7	7	Quinidine	QND	antiarrhythmic																																									0	n.a.	n.a.
	129	8	8	N-desethylamiodarone	N-DAMD	antiarrhythmic (metabolite)																							336	152	42	58	63	460	140	111	169	70	251	294	199	241					42	160.5	184.714
				Antiplatelet (anti-blood clot)
	130	9	1	Clopidogrel	CLP	Antiplatelet																																									0	n.a.	n.a.
	131	10	2	Clopidogrel Carboxylic Acid	CLP-CA	Antiplatelet (metabolite)																																									0	n.a.	n.a.
				ANTIHYPERTENSIVES - Angiotensin-converting enzyme (ACE) inhibitor
	132	11	1	Enalapril	ENL	Angiotensin-converting enzyme (ACE) inhibitor							˂LOQ	˂LOQ																																	0	n.a.	n.a.
	133	12	2	Enalaprilat	ENT	Angiotensin-converting enzyme (ACE) inhibitor (enalapril active metabolite)							˂LOQ	6.1																																	6.1	6.1	6.1
	134	13	3	Ramipril	RMP	Angiotensin-converting enzyme (ACE) inhibitor							˂LOQ	˂LOQ																																	0	n.a.	n.a.
	135	14	4	Ramiprilat	RMT	Angiotensin-converting enzyme (ACE) inhibitor							4.1	3.8																																	3.8	3.95	3.95
				ANTIHYPERTENSIVES - Angiotensin II receptor blocker (ARB)
	136	15	1	Eprosartan	EPR	Angiotensin II receptor blocker (ARB)																																									0	n.a.	n.a.
	137	16	2	Irbesartan	IRB	Angiotensin II receptor blocker (ARB)							230	355											<MDL	<MDL			75	518	72	24	55	138	115	43	34	116	63	141	274	87					24	101	146.25
	138	17	3	Losartan	LOS	Angiotensin II receptor blocker (ARB)							99	48								23	28			<MDL			68	111	51	<LOQ	53	59	<LOQ	n.d.	<LOQ	n.d.	<LOQ	<LOQ	60	110					23	59	64.5455
	139	18	4	Telmisartan	TMS	Angiotensin II receptor blocker (ARB)																							777	948	315	198	960	998	515	202	776	312	367	272	829	1219					198	645.5	620.571
	140	19	5	Valsartan	VLS	Angiotensin II receptor blocker (ARB)							155.5	129.5											<MDL	<MDL			95	542	96	14	93	1091	45	<LOQ	178	<LOQ	176	12	53	194					12	112.75	205.286
				β-blockers
	141	20	1	Acebutolol	ACB	β-blocker																																									0	n.a.	n.a.
	142	21	2	Atenolol	ATN	β-blocker		3.37	3.73			2.29	15	8.76								5.6	8.8																								2.29	5.6	6.79286
	143	22	3	Bisoprolol	BSP	β-blocker																																									0	n.a.	n.a.
	144	23	4	Metoprolol	MTP	β-blocker		17	4.8	4.59	4.12	5.3			7							123	181		190	410																					4.12	12	94.681
	145	24	5	Nadolol	NAD	β-blocker																																									0	n.a.	n.a.
	146	25	6	Propranolol	PRP	β-blocker		18.2	9.52	9.89	12.3	97.8										27	68		16	25			17	<LOQ	16	<LOQ	15	5	22	23	18	8	11	19	9	9					5	16	21.7005
	147	26	7	Sotalol	STL	β-blocker																			<MDL	<MQL																					0	n.a.	n.a.
				Diuretics
	148	27	1	Furosemide	FRS	Diuretic							31.4	8.8											<MDL	<MDL																					8.8	20.1	20.1
	149	28	2	Hydrochlorothiazide	HCT	Diuretic							51.9	20.3	4																																4	20.3	25.4
				Calcium channel blockers
	150	29	1	Amlodipine	AML	Calcium Channel blocker																																									0	n.a.	n.a.
	151	30	2	Diltiazem	DTZ	Calcium Channel blocker																																									0	n.a.	n.a.
	152	31	3	Verapamil	VRP	Calcium Channel blocker																																									0	n.a.	n.a.
				Total cardiac care medications																																											385.11	1349.8	1723.32
				Antifungals
	153	1	1	Amorolfine	AMO	Antifungals (morpholine)																																									0	n.a.	n.a.
	154	2	2	Fluconazole	FLZ	Antifungals (azole)																0.5	0.4																								0.4	0.45	0.45
	155	3	3	Ketokonazole	KTZ	Antifungals (imidazole)																186	3009																								186	1597.5	1597.5
	156	4	4	Miconazole	MCZ	Antifungals (imidazole)																																									0	n.a.	n.a.
				Total antifungals																																											186.4	1597.95	1597.95
				LIPID REGULATORS, ANTHYPERLIPIDEMICS
				Statins
	157	1	1	Atorvastatin	ATV	Lipid regulator							3.6	1.3											<MDL	<MDL																					1.3	2.45	2.45
	158	2	2	Pravastatin	PRV	Lipid regulator																																									0	n.a.	n.a.
	159	3	3	Rosuvastatin	RSV	Lipid regulator							7.1	5.1																																	5.1	6.1	6.1
	160	4	4	Simvastatin	SMV	Lipid regulator							8.4	˂LOQ																																	8.4	8.4	8.4
				Fibrates
	161	5	1	Bezafibrate	BZF	Lipid regulator		6.9	3.51	2.24	3.29		3.7	2											<MDL	<MDL																					2	3.4	3.60667
	162	6	2	Clofibric Acid	CLF-A	Lipid regulator					NG	NG	˂LOQ	˂LOQ													51	61																			51	56	56
	163	7	3	Fenofibrate	FNF	Lipid regulator																																									0	n.a.	n.a.
	164	8	4	Fenofibric Acid	FNF-A	Lipid regulator (Fenofibrate active metabolite)																																									0	n.a.	n.a.
	165	9	5	Gemfibrozil	GMF	Lipid regulator							6.1	6																																	6	6.05	6.05
				Total lipid regulators																																											73.8	82.4	82.6067
				ANTIHISTAMINES AND BRONCHODILATORS
	166	1	1	Cimetidine	CIM	Antihistamine (H2 blocker)																																									0	n.a.	n.a.
	167	2	2	Diphenhydramine	DPD	Antihistamine (H1 receptor antagonist)																																									0	n.a.	n.a.
	168	3	3	Ranitidine	RNT	Antihistamine (H2 blocker)							41	40.7																																	40.7	40.85	40.85
	169	4	4	Salbutamol	SAL	Bronchodilator (short-acting B2 agonist-SABA)							53.1	58.1																																	53.1	55.6	55.6
	170	5	5	Terbutaline	TBT	Bronchodilator (short-acting B2 agonist-SABA)																																									0	n.a.	n.a.
				Total antihistamines																																											93.8	96.45	96.45
				Antineoplastics
				Alkylating agent
	171	1	1	Cyclophosphamide	CYP								˂LOQ	˂LOQ																																	0	n.a.	n.a.
				Antimetabolite
	172	2	1	Methotrexate	MTX								˂LOQ	˂LOQ																																	0	n.a.	n.a.
				Immunosuppressant
	173	3	1	Mycophenolate Mofetil	MPM	Immunosuppresive agents																																									0	n.a.	n.a.
	174	4	2	Mycophenolic Acid	MP-A	Immunosuppresive agents																																									0	n.a.	n.a.
				ERECTILE DYSFUNCTION AGENTS
	175	1	1	Sildenafil	SLD	Erectile disfunction agent							11.1	10																																	10	10.55	10.55
	176	2	2	Yohimbine	YOH	Erectile disfunction agent																																									0	n.a.	n.a.
				X-RAY CONTRAST AGENT	X-ray contrast media
	177	1	1	Iopromide	IOP	X-ray contrast media																																									0	n.a.	n.a.
				ANTIDIABETICS
	178	1	1	Sitagliptin	SIT	Antidiabetics																																									0	n.a.	n.a.
				ANTIVIROTICS
	179	1	1	Amantadine	AMN	Antivirotics																																									0	n.a.	n.a.
	180	2	2	Oseltamivir	OSL	Antivirotics																																									0	n.a.	n.a.
				MUSCLE RELAXANTS
	181	1	1	Carisoprodol	CRP	Muscle relaxants																																									0	n.a.	n.a.
	182	2	2	Methocarbamol	MTC	Muscle relaxants																																									0	n.a.	n.a.
				ANESTHETICS
	183	1	1	Benzocaine	BNZ	Anesthetics																																									0	n.a.	n.a.
				CHOLINERGIC AND ANTICHOLINERGIC DRUGS
	184	1	1	Pilocarpine	PLC	Cholinergic agonists																																									0	n.a.	n.a.
	185	2	2	Solifenacin	SLF	Cholinergic antagonists (anticholinergics)																																									0	n.a.	n.a.
				ANTIHELMINTHICS
	186	1	1	Praziquantel	PRQ	Antihelminthics																																									0	n.a.	n.a.
				ANTIEMETICS
	187	1	1	Metoclopramide	MCP	Antiemetics																																									0	n.a.	n.a.
				Total other PPs																																											10	10.55	10.55
				Total all PPs																																											8330.02	14133.4	18949.5
				NOT CLASSIFIED BY THERAPEUTIC USE
				Matrix-assisted laser desorption ionization mass spectrometry imaging (MALDI-MSI)
				Analyte	CAS RN	Therapeutic classification
	188	1	1	1-(4-Methylpiperazino)-2-[(2-phenylquinoline-4-yl)oxy]ethan-1-one but-2-ene-dioic acid	-	Not specified in the reviewed article
	189	2	2	1-[(3,3-Diphenylpropyl)(methyl)amino]-2-methylpropan-2-ol	100442-33-9	Not specified in the reviewed article
	190	3	3	1-[(4-phenyl-4-piperidyl)carbonyl]pyrrolidine monohydrochloride	83929-36-6	Not specified in the reviewed article
	191	4	4	1-Hydroxymethyltriazolam. alpha-Hydroxy-Triazolam	37115-45-0	Not specified in the reviewed article
	192	5	5	1-Methyl-4-BenzylpiperazineÃ‚Â (MBZP)	62226-74-8	Not specified in the reviewed article
	193	6	6	1-Propanamine, 3-dibenz[b,e]oxepin-11(6H)-ylidene-N-methyl-	1225-56-5	Not specified in the reviewed article
	194	7	7	1-Propanesulfonic acid, 3-(cyclohexylamino)-	1135-40-6	Not specified in the reviewed article
	195	8	8	2-(1-Piperazinyl)-4-amino-6,7-dimethoxyquinazoline	60547-97-9	Not specified in the reviewed article
	196	9	9	2,2-DIPHENYLETHYLAMINE,N,N-DIMETHYL	7647-54-3	Not specified in the reviewed article
	197	10	10	2',3'-Dideoxycytidine	7481-89-2	Not specified in the reviewed article
	198	11	11	2,3-Dihydro-1,4-benzodioxin-2-yl(piperazin-1-yl)methanone	401941-54-6	Not specified in the reviewed article
	199	12	12	2,4(1H,3H)-Pyrimidinedione, 6-(chloromethyl)-	18592-13-7	Not specified in the reviewed article
	200	13	13	2-Amino-N-cyclohexyl-N-methylbenzylamine	57365-08-9	Not specified in the reviewed article
	201	14	14	2-thien-2-ylthiazolidine-4-carboxylic acid	32451-19-7	Not specified in the reviewed article
	202	15	15	3-[(2,6-dichlorophenyl)methylene]-N-hydroxycarbazamidine hydrochloride	23256-40-8	Not specified in the reviewed article
	203	16	16	3-[4-(Trifluoromethoxy)phenyl]acrylic acid	783-13-1	Not specified in the reviewed article
	204	17	17	3-{[(Cyanoimino)(methylthio)methyl]amino}-2-oxoazepane	-	Not specified in the reviewed article
	205	18	18	3-acetoxy-a,a,a-trifluoro-p-toluic acid	322-79-2	Not specified in the reviewed article
	206	19	19	1-(3-methoxybenzyl)piperazine (3-MBZP)	55212-32-3	Not specified in the reviewed article
	207	20	20	4-(methylsulphonyl)-3-nitrobenzoic acid	81029-08-5	Not specified in the reviewed article
	208	21	21	4-amino-5-nitro-o-anisic acid	59338-90-8	Not specified in the reviewed article
	209	22	22	5-(Aminosulphonyl)-2-methoxybenzoyl chloride	52542-44-6	Not specified in the reviewed article
	210	23	23	5,7-Dichloro tryptamine	94850-28-9	Not specified in the reviewed article
	211	24	24	5-hydroxy-4-(hydroxymethyl)-6-methyl-3-pyridylmethyl dihydrogen phosphate	447-05-2	Not specified in the reviewed article
	212	25	25	9-(2-carboxy-4-isothiocyanatophenyl)-3,6-bis(dimethylamino)xanthylium chloride	6749-36-6	Not specified in the reviewed article
	213	26	26	Adenosine	58-61-7	Not specified in the reviewed article
	214	27	27	Adrenalone	99-45-6	Not specified in the reviewed article
	215	28	28	Allopurinol riboside	16220-07-8	Not specified in the reviewed article
	216	29	29	Alprenolol	13655-52-2	Not specified in the reviewed article
	217	30	30	Alypin	963-07-5	Not specified in the reviewed article
	218	31	31	Amiterol	54063-25-1	Not specified in the reviewed article
	219	32	32	Anagrelide	68475-42-3	Not specified in the reviewed article
	220	33	33	Atenolol met 6 - 264	108913-85-5	Not specified in the reviewed article
	221	34	34	Aureothricin	574-95-8	Not specified in the reviewed article
	222	35	35	Azacyclonol	115-46-8	Not specified in the reviewed article
	223	36	36	Baquiloprim	1228182-50-0	Not specified in the reviewed article
	224	37	37	Bazedoxifene	198481-33-3	Not specified in the reviewed article
	225	38	38	Benzodioxolfentanyl	2306823-01-6	Not specified in the reviewed article
	226	39	39	Benzphetamine	156-08-1	Not specified in the reviewed article
	227	40	40	Brofoxine	21440-97-1	Not specified in the reviewed article
	228	41	41	Bromisovalum	496-67-3	Not specified in the reviewed article
	229	42	42	Bucetin	1083-57-4	Not specified in the reviewed article
	230	43	43	Bunitrolol	34915-68-9	Not specified in the reviewed article
	231	44	44	Carzenide	138-41-0	Not specified in the reviewed article
	232	45	45	Cipamfylline	132210-43-6	Not specified in the reviewed article
	233	46	46	Clenbuterol	37148-27-9	Not specified in the reviewed article
	234	47	47	Clidinium	3485-62-9	Not specified in the reviewed article
	235	48	48	Cromophene	16150-45-1	Not specified in the reviewed article
	236	49	49	Cyclopentynafil	1173706-34-7	Not specified in the reviewed article
	237	50	50	Cymiazole	61676-87-7	Not specified in the reviewed article
	238	51	51	Deferoxamine	70-51-9	Not specified in the reviewed article
	239	52	52	Desoxypipradol	519-74-4	Not specified in the reviewed article
	240	53	53	Dexamethasone	50-02-2	Not specified in the reviewed article
	241	54	54	Diethylcarbamazine	90-89-1	Not specified in the reviewed article
	242	55	55	Dimethisoquin	2773-92-4	Not specified in the reviewed article
	243	56	56	Dimyristylamine	17361-44-3	Not specified in the reviewed article
	244	57	57	Dinortramadol	931115-27-4	Not specified in the reviewed article
	245	58	58	Doxylamine	562-10-7	Not specified in the reviewed article
	246	59	59	Epinastine	108929-04-0	Not specified in the reviewed article
	247	60	60	Ethanesulfonic acid, 2-(cyclohexylamino)-	103-47-9	Not specified in the reviewed article
	248	61	61	Etoloxamine	1157-87-5	Not specified in the reviewed article
	249	62	62	Fenpiprane	3540-95-2	Not specified in the reviewed article
	250	63	63	Fluphenazine	69-23-8	Not specified in the reviewed article
	251	64	64	Gallopamil	16662-47-8	Not specified in the reviewed article
	252	65	65	Guanethidine	55-65-2	Not specified in the reviewed article
	253	66	66	Guanosine	81759-48-0	Not specified in the reviewed article
	254	67	67	Hydrocortisone 21-hexanoate	3593-96-2	Not specified in the reviewed article
	255	68	68	Lacosamide	175481-36-4	Not specified in the reviewed article
	256	69	69	Leucylproline	6403-35-6	Not specified in the reviewed article
	257	70	70	Lonazolac	53808-88-1	Not specified in the reviewed article
	258	71	71	l-Tryptophan	54-12-6	Not specified in the reviewed article
	259	72	72	L-Tyrosine	60-18-4	Not specified in the reviewed article
	260	73	73	Mebhydrolin	6153-33-9	Not specified in the reviewed article
	261	74	74	Mebutamate	64-55-1	Not specified in the reviewed article
	262	75	75	Mepivacaine	96-88-8	Not specified in the reviewed article
	263	76	76	Methaqualone	72-44-6	Not specified in the reviewed article
	264	77	77	Methohexital	151-83-7	Not specified in the reviewed article
	265	78	78	Metizolam (Desmethyletizolam)	40054-68-0	Not specified in the reviewed article
	266	79	79	Miglustat	72599-27-0	Not specified in the reviewed article
	267	80	80	N,O-Didesmethylvenlafaxine	135308-74-6	Not specified in the reviewed article
	268	81	81	N-Amidinododecanamide	5634-27-5	Not specified in the reviewed article
	269	82	82	N-desmethyl diltiazem	85100-17-0	Not specified in the reviewed article
	270	83	83	N-desmethylpheniramine	19428-44-5	Not specified in the reviewed article
	271	84	84	N-Nitrosodicyclohexylamine	947-92-2	Not specified in the reviewed article
	272	85	85	Nomifensine	24526-64-5	Not specified in the reviewed article
	273	86	86	Nordiltiazem	-	Not specified in the reviewed article
	274	87	87	Nordoxepin	67035-76-1	Not specified in the reviewed article
	275	88	88	Norvenlafaxine	149289-30-5	Not specified in the reviewed article
	276	89	89	O-Desmethyl Venlafaxine	142761-11-3	Not specified in the reviewed article
	277	90	90	Pamidronic acid	40391-99-9	Not specified in the reviewed article
	278	91	91	Phenallymal	115-43-5	Not specified in the reviewed article
	279	92	92	Pheniramine	86-21-5	Not specified in the reviewed article
	280	93	93	Picric acid	88-89-1	Not specified in the reviewed article
	281	94	94	Prilocaine	721-50-6	Not specified in the reviewed article
	282	95	95	Primaquine	90-34-6	Not specified in the reviewed article
	283	96	96	Propyphenazone	479-92-5	Not specified in the reviewed article
	284	97	97	Proquazone	22760-18-5	Not specified in the reviewed article
	285	98	98	Quinoline, 2-(phenylthio)-	22190-12-1	Not specified in the reviewed article
	286	99	99	Quinupramine	31721-17-2	Not specified in the reviewed article
	287	100	100	Riluzole	1744-22-5	Not specified in the reviewed article
	288	101	101	Rivaroxaban Manuel	366789-02-8	Not specified in the reviewed article
	289	102	102	Rivastigmine	123441-03-2	Not specified in the reviewed article
	290	103	103	Saccharin N-(2-acetic acid ethyl ester)	24683-20-3	Not specified in the reviewed article
	291	104	104	Salvianolic acid A	96574-01-5	Not specified in the reviewed article
	292	105	105	Teoprolol	65184-10-3	Not specified in the reviewed article
	293	106	106	Terfenadine	50679-08-8	Not specified in the reviewed article
	294	107	107	Thiodimethyl Sildenafil	856190-47-1	Not specified in the reviewed article
	295	108	108	Thioridazine	50-52-2	Not specified in the reviewed article
	296	109	109	Tolfenamic acid	13710-19-5	Not specified in the reviewed article
	297	110	110	Tolpropamine	5632-44-0	Not specified in the reviewed article
	298	111	111	Tolycaine	3686-58-6	Not specified in the reviewed article
	299	112	112	Trandolapril	87679-37-6	Not specified in the reviewed article
	300	113	113	Triphenylsilanol	791-31-1	Not specified in the reviewed article
	301	114	114	Zinterol	38241-28-0	Not specified in the reviewed article
[truncated: 34 more columns]

## Sheet: Sheet 4-PCPs
				Reference number			4	10	51	51	9	52	20	20	15	15	19	19				54	54	54	54	54	54	54	54	54		Statistics							2	2	2	2	2	2	10			53	53
				Chromatographic separation (GC or LC)			GC	HPLC	UPLC	UPLC	HPLC	HPLC			GC	GC	GC	GC																					Biosolids	Biosolids	Biosolids	Biosolids	Biosolids	Biosolids	HPLC
				Extraction technique (SPE, dSPE)			ASE	SPLE	orbital shaker	orbital shaker	Sewage sludge	Orbital shaker			MAE (Microwave-Assisted Extraction)	MAE (Microwave-Assisted Extraction)																							(ng g-1 d.w)	(ng g-1 d.w)	(ng g-1 d.w)	(ng g-1 d.w)	(ng g-1 d.w)	(ng g-1 d.w)	SPLE
				Cleanup			Not used	SPLE	SPE	SPE		SPE			d-SPE	d-SPE																													SPLE
				Analysis			MS/MS	MS/MS	MS/MS	MS/MS		MS/MS			MS/MS	MS/MS																													MS/MS
				Matrix			Sewage sludge	Digested sludge	Sludge	Sludge	Composted sludge	Sludge	Digested sludge N1	Digested sludge N2	Sewage sludge-Thickened-Mixed Sludge Influent (TMSI)	Sewage sludge-Anaerobically-Digested Thickened-Mixed Sludge Effluent (ADTMSE)	Sewage sludge - Pre-TAH	Sewage sludge - Post-TAH	Anaerobically digested sludge	Composted sludge	Aerobically and dehydrated digested sludge	Sewage sludge	Sewage sludge	Sewage sludge	Sewage sludge	Sewage sludge	Sewage sludge	Sewage sludge	Sewage sludge	Sewage sludge		Sewage sludge													Soil			Soil	Soil samples
				Unit			ng g-1	Mean (ng g-1)	Mean (ng/g)	Median (ng/g)	conc. (ng g-1)	Conc. (ng/g)	Conc. (ng/g)	Conc. (ng/g)	Conc. (ng/g)	Conc. (ng/g)	Conc. (ng/g)	Conc. (ng/g)	(ng/g)	(ng/g)	(ng/g)	Max (ng/g)	Median (ng/g)	Mean (ng/g)	Max (ng/g)	Median (ng/g)	Mean (ng/g)	Max (ng/g)	Median (ng/g)	Mean (ng/g)		Min (ng/g)	Median (ng/g)	Mean (ng/g)	95th percentile (ng/g)	Max (ng/g)	STD (ng/g)								Mean (ng g-1)			Min (ng/g)	Mean (ng/g)
				PERSONAL CARE PRODUCTS (PCPs)
				PRESERVATIVE PARABENS AND METABOLITES
	302	1	1	Methyl Paraben	MeP			87	59.4	48.8	9.3	94.2	13	5.1	< MLQ	< MLQ			26	11	˂LOD	630	46	66	630	54	74	40	13	15		5.1	47.4	106.767	630	630	192.339								˂LOD			˂LOD	2.21
	303	2	2	Ethyl Paraben	EtP				2.21	0.477		2.45	<MDL	<MDL	< MLQ	< MLQ			25	38	˂LOD	170	9	12	170	9	13	19	7	7		0.477	10.5	34.5812	170	170	58.2251											˂LOD	0.0457
	304	3	3	Propyl Paraben	PrP			14	5.88	3.46	˂LOD	32.4	<MDL	<MDL	113	216			˂LOD	˂LOD	˂LOD	27	9	9	27	9	9	20	6	7		3.46	9	33.8493	143.9	216	57.1949								˂LOD			˂LOD	0.49
	305	4	4	Isopropyl-paraben	iPrP										172	90																90	131	131	167.9	172	57.9828											˂LOD	0.102
	306	5	5	Butyl Paraben	BuP				0.207	˂LOQ		11.8										11	8	8	11	8	8	11	8	7		0.207	8	8.36427	11.4	11.8	3.18922											˂LOD	0.00519
	307	6	6	Isobutyl-paraben	iBuP																											0	n.a.	n.a.	n.a.	0	0											˂LOD	0.00722
	308	7	7	Heptyl Paraben	HepP				˂LOQ	˂LOQ		5.24																				5.24	5.24	5.24	5.24	5.24	0											˂LOD	0.0184
	309	8	8	Benzyl Paraben	BzP				˂LOQ	˂LOQ		7.49	<MDL	<MDL					9	6	˂LOD	12	1	2	11	1	1	12	1	4		1	5	5.62417	12	12	4.53797											˂LOD	0.00437
	310	9	9	Methyl protocatechuate	OH-MeP			139			8.9	12.7																				8.9	12.7	53.5333	126.37	139	74.0407								˂LOQ
	311	10	10	3,4-dihydroxybenzoic acid	3,4-DHB			254			86	33																				33	86	124.333	237.2	254	115.379								˂LOD
	312	11	11	4-hydroxybenzoic acid	4-HB			1150			100	98.4																				98.4	100	449.467	1045	1150	606.68								8.1	45	36
	313	12	12	Ethyl protocatechuate	OH-EtP							2.17																				2.17	2.17	2.17	2.17	2.17	0
				Total parabens																												247.954	417.01	954.929	2551.18	2762.21	1169.57
				CHLOROPHENOLIC ANTIMICROBIALS AND METABOLITES
	314	13	1	Triclosan (Irgasan)	TCS		2236		1660	1680			365	<MDL			6165	3664	88	205	93.4	4870	770	1090	4870	970	1240	1310	25	160		25	1165	1747.86	5064.25	6165	1888.78		323	<MDL	<MDL	<MDL	<MDL	<MDL
	315	14	2	Triclocarban	TCC				2350	1710			143	<MQL			86	54	1.4	5.7	1.1	43300	5870	8450	43300	6710	9630	13940	41	1190		1.1	1710	8046.01	43300	43300	13912.8
	316	15	3	2′-hydroxy-triclocarban	2-OH-TCC																	2340	140	270	2340	170	310	180	21	27		21	180	644.222	2340	2340	966.118
	317	16	4	3′-hydroxy-triclocarban	3-OH-TCC																	1250	44	96	1250	51	110	74	1	8		1	74	320.444	1250	1250	528.232
	318	17	5	Carbanilide	CBN																	1340	30	91	1340	31	97	480	3	48		3	91	384.444	1340	1340	560.5
	319	18	6	Monocarbanilide	MCC																	120	31	32	120	31	35	32	13	15		13	32	47.6667	120	120	41.7433
	320	19	7	Dichlorocarbanilide	DCC																	23890	240	710	23890	310	820	520	40	64		40	520	5609.33	23890	23890	10367.6
	321	20	8	3,3′,4,4′-tetrachlorocarbanilide	TCCC																	580	82	113	580	92	125	102	28	36		28	102	193.111	580	580	221.709
				Total antimicrobials																												132.1	3874	16993.1	77884.2	78985	28487.5
				Total all PCPs																												380.054	4291.01	17948	80435.4	81747.2	29657
[truncated: 10 more columns]

## Sheet: Sheet 5-HORMONES
				Reference number			1	1	1	1	1	3	3	4	13	13	Statistics							11	11	11	11	11	11	Statistics							5	5	5	5	5	5	Statistics
				Chromatographic separation (GC or LC)			UPLC	UPLC	UPLC	UPLC	UPLC	HPLC	HPLC	GC										LC	LC	LC	LC	LC	LC								GC	GC	GC	GC	GC	GC
				Extraction technique (SPE, dSPE)			ASE	ASE	ASE	ASE	ASE	ASE	ASE	ASE	Espresso (n=3)	Pressurized Hot Water Extraction (PHWE) (n=3)								UAE	UAE	UAE	UAE	UAE	UAE								UAE	UAE	UAE	UAE	UAE	UAE
				Cleanup			SPE	SPE	SPE	SPE	SPE	SPE	SPE	Not used										SPE	SPE	SPE	SPE	SPE	SPE								SPE	SPE	SPE	SPE	SPE	SPE
				Analysis			MS/MS	MS/MS	MS/MS	MS/MS	MS/MS	MS/MS	MS/MS	MS										MS/MS	MS/MS	MS/MS	MS/MS	MS/MS	MS/MS								MS	MS	MS	MS	MS	MS
				Matrix			Sewage sludge - Lisbon 1 (median)	Sewage sludge Lisbon 2 (median)	Sewage sludge Lisbon 3 (median)	Sewage sludge Faro 1 (median)	Sewage sludge Faro 2 (median)	Sewage sludge Winter occurrence in SS	Sewage sludge Summer occurrence in SS	Sewage sludge	Sewage sludge	Sewage sludge	Sewage sludge							Biosolids - Min original samples (free form)	Biosolids - Mean original samples (free form)	Biosolids - Max original samples (free form)	Biosolids - Min original samples (conjugate form)	Biosolids - Biosolids	Biosolids - Max original samples (conjugate form)	Biosolids							Soil Site 2	Soil Site 3	Soil Site 4	Soil Site 5	Soil Site 6		Soil
				Unit			ng g-1	ng g-1	ng g-1	ng g-1	ng g-1	ng g-1	ng g-1	ng g-1	µg/kg	µg/kg	Min (ng/g)	Median (ng/g)	Mean (ng/g)	95th percentile (ng/g)	Max (ng/g)	STD (ng/g)		ng g-1	ng g-2	ng g-3	ng g-4	ng g-5	ng g-6	Min (ng/g)	Median (ng/g)	Mean (ng/g)	95th percentile (ng/g)	Max (ng/g)	STD (ng/g)		conc (ng g-1)	conc (ng g-1)	conc (ng g-1)	conc (ng g-1)	conc (ng g-1)	conc (ng g-1)	Min (ng/g)	Median (ng/g)	Mean (ng/g)	95th percentile (ng/g)	Max (ng/g)	STD (ng/g)
				HORMONES
				NATURAL HORMONES
	322	1	1	Androstenedione	A4												0	n.a.	n.a.	n.a.	0	n.a.		2.9	24	312	4.2	17	73	2.9	20.5	72.1833	252.25	312	120.251								0	n.a.	n.a.	n.a.	0	n.a.
	323	2	2	Androsterone	AN												0	n.a.	n.a.	n.a.	0	n.a.		34	60	61	33	48	97	33	54	55.5	88	97	23.6538								0	n.a.	n.a.	n.a.	0	n.a.
	324	3	3	Cortisone	E					NG	NG						0	n.a.	n.a.	n.a.	0	n.a.								n.m.	n.m.	n.m.	n.m.	n.m.	n.m.								0	n.a.	n.a.	n.a.	0	n.a.
	325	4	4	Estrone	E1					NG	NG	25.1	22.9		7.9	11	7.9	16.95	16.725	24.77	25.1	8.54259		2.9	4	297	3.2	3.9	112	2.9	3.95	70.5	250.75	297	119.148		5.4	˂LOD	˂LOD	7.2	˂LOD	˂LOD	5.4	6.3	6.3	7.11	7.2	1.27279
	326	5	5	17 β-estradiol	E2 (17 β-E2)		NG	NG	NG	NG	NG	14.3	16.2	29			14.3	16.2	19.8333	27.72	29	7.99521		3.8	7.5	12	3.4	6.3	8.3	3.4	6.9	6.88333	11.075	12	3.17957		˂LOQ	˂LOD	˂LOD	˂LOD	˂LOD	˂LOD	0	n.a.	n.a.	n.a.	0	n.a.
	327	6	6	17 α-estradiol	17 α-E2												0	n.a.	n.a.	n.a.	0	n.a.		3.3	4.2	11	3.2	3.9	8.4	3.2	4.05	5.66667	10.35	11	3.25187								0	n.a.	n.a.	n.a.	0	n.a.
	328	7	7	Estriol	E3		NG	NG	NG	NG	NG						0	n.a.	n.a.	n.a.	0	n.a.		13	82	227	29	108	690	13	95	191.5	574.25	690	255.732		˂LOD	˂LOD	1.9	˂LOD	˂LOD	˂LOD	1.9	1.9	1.9	1.9	1.9	n.a.
	329	8	8	Progesterone	P												0	n.a.	n.a.	n.a.	0	n.a.		5.1	33	6110	3	24	506	3	28.5	1113.52	4709	6110	2455.62								0	n.a.	n.a.	n.a.	0	n.a.
	330	9	9	Testosterone	T		6.4	3.26		2.92	3.69						2.92	3.475	4.0675	5.9935	6.4	1.5866		0.76	4.6	22	3.3	88	6.8	0.76	5.7	20.91	71.5	88	33.715								0	n.a.	n.a.	n.a.	0	n.a.
	331	10	10	Equilin	EQL												0	n.a.	n.a.	n.a.	0	n.a.		6.6	8	25	6.4	7.9	16	6.4	7.95	11.65	22.75	25	7.45111								0	n.a.	n.a.	n.a.	0	n.a.
	332	11	11	Equilenin	EQN												0	n.a.	n.a.	n.a.	0	n.a.		0.66	0.88	4.6	0.64	0.79	1.7	0.64	0.835	1.545	3.875	4.6	1.54736								0	n.a.	n.a.	n.a.	0	n.a.
				Total natural hormones													25.12	36.625	40.6258	58.4835	60.5	18.1244								69.2	227.385	1549.86	5993.8	7646.6	3023.55								7.3	8.2	8.2	9.01	9.1	1.27279
				SYNTHETIC HORMONES
	333	12	1	17 α-ethinylestradiol	EE2							˂LOQ	˂LOQ				0	n.a.	n.a.	n.a.	0	n.a.		4.8	6.7	40	4	4.9	20	4	5.8	13.4	35	40	14.3567								0	n.a.	n.a.	n.a.	0	n.a.
	334	13	2	Allyl Trenbolone / Altrenogest	ALT												0	n.a.	n.a.	n.a.	0	n.a.		0.47	0.86	1.8	0.63	0.83	0.94	0.47	0.845	0.921667	1.585	1.8	0.463267								0	n.a.	n.a.	n.a.	0	n.a.
	335	14	3	Desogestrel	DSG												0	n.a.	n.a.	n.a.	0	n.a.		65	252	1050	˂LOQ	˂LOQ	˂LOQ	65	252	455.667	970.2	1050	523.131								0	n.a.	n.a.	n.a.	0	n.a.
	336	15	4	Diethylstilbestrol	DES					NG	NG						0	n.a.	n.a.	n.a.	0	n.a.								n.m.	n.m.	n.m.	n.m.	n.m.	n.m.		˂LOD	˂LOD	˂LOD	˂LOQ	˂LOD	˂LOD	0	n.a.	n.a.	n.a.	0	n.a.
	337	16	5	Gestodene	GST		56.3	25									25	40.65	40.65	54.735	56.3	22.1324								n.m.	n.m.	n.m.	n.m.	n.m.	n.m.								0	n.a.	n.a.	n.a.	0	n.a.
	338	17	6	Melengestrol Acetate	MGA												0	n.a.	n.a.	n.a.	0	n.a.		0.74	1	7.6	0.8	1.2	3.3	0.74	1.1	2.44	6.525	7.6	2.70392								0	n.a.	n.a.	n.a.	0	n.a.
	339	18	7	Mestranol	EEME												0	n.a.	n.a.	n.a.	0	n.a.		20	42	226	125	970	9010	20	175.5	1732.17	7000	9010	3582.94								0	n.a.	n.a.	n.a.	0	n.a.
	340	19	8	Norethindrone	NRT												0	n.a.	n.a.	n.a.	0	n.a.		3.3	4	7.7	5.6	7.3	8.2	3.3	6.45	6.01667	8.075	8.2	2.04296								0	n.a.	n.a.	n.a.	0	n.a.
	341	20	9	Norgestrel	NRG												0	n.a.	n.a.	n.a.	0	n.a.		3.3	4.2	22	5.6	7.4	9.4	3.3	6.5	8.65	18.85	22	6.90036								0	n.a.	n.a.	n.a.	0	n.a.
	342	21	10	17 α-dihydroequilin	2H-EQL												0	n.a.	n.a.	n.a.	0	n.a.		3.8	5.8	28	3.4	5.4	12	3.4	5.6	9.73333	24	28	9.46967								0	n.a.	n.a.	n.a.	0	n.a.
				Total synthetic hormones													25	40.65	40.65	54.735	56.3	22.1324		101.41	316.56	1383.1	145.03	997.03	9063.84	100.21	453.795	2229	8064.23	10167.6	4142.01		0	0	0	0	0	0	0	0	0	0	0	0
				Total hormones													50.12	77.275	81.2758	113.218	116.8	40.2568								169.41	681.18	3778.85	14058	17814.2	7165.56								7.3	8.2	8.2	9.01	9.1	1.27279

## Sheet: Sheet 6-BISPHENOLS
				Reference number			95	95	95	95	95	95	95	95	95	95	95	95	95	95	95	95	95	95	95	95	95	95	95	95	95	95	95	95	95	95	95	95	99	99	99	99	99	20	20	20	20	20	20
				Chromatographic separation (GC or LC)			UPLC	UPLC	UPLC	UPLC	UPLC	UPLC	UPLC	UPLC	UPLC	UPLC	UPLC	UPLC	UPLC	UPLC	UPLC	UPLC	UPLC	UPLC	UPLC	UPLC	UPLC	UPLC	UPLC	UPLC	UPLC	UPLC	UPLC	UPLC	UPLC	UPLC	UPLC	UPLC	GC	GC	GC	GC	GC
				Extraction technique (SPE, dSPE)			ASE	ASE	ASE	ASE	ASE	ASE	ASE	ASE	ASE	ASE	ASE	ASE	ASE	ASE	ASE	ASE	ASE	ASE	ASE	ASE	ASE	ASE	ASE	ASE	ASE	ASE	ASE	ASE	ASE	ASE	ASE	ASE	ASE	ASE	ASE	ASE	ASE
				Cleanup			In-cell purification	In-cell purification	In-cell purification	In-cell purification	In-cell purification	In-cell purification	In-cell purification	In-cell purification	In-cell purification	In-cell purification	In-cell purification	In-cell purification	In-cell purification	In-cell purification	In-cell purification	In-cell purification	In-cell purification	In-cell purification	In-cell purification	In-cell purification	In-cell purification	In-cell purification	In-cell purification	In-cell purification	In-cell purification	In-cell purification	In-cell purification	In-cell purification	In-cell purification	In-cell purification	In-cell purification	In-cell purification
				Analysis			MS/MS	MS/MS	MS/MS	MS/MS	MS/MS	MS/MS	MS/MS	MS/MS	MS/MS	MS/MS	MS/MS	MS/MS	MS/MS	MS/MS	MS/MS	MS/MS	MS/MS	MS/MS	MS/MS	MS/MS	MS/MS	MS/MS	MS/MS	MS/MS	MS/MS	MS/MS	MS/MS	MS/MS	MS/MS	MS/MS	MS/MS	MS/MS	MS/MS	MS/MS	MS/MS	MS/MS	MS/MS
				Matrix			Soil	Soil	Soil	Soil	Soil	Soil	Soil	Soil	Soil	Soil	Soil	Soil	Soil	Soil	Soil	Soil	Soil	Soil	Soil	Soil	Soil	Soil	Soil	Soil	Soil	Soil	Soil	Soil	Soil	Soil	Soil	Soil	Soil	Soil	Soil	Soil	Soil	Soil	Soil	Soil	Soil	Soil	Soil
				Unit			Median (ng g-1)	Average (ng g-1)																															concentration (ng g-1)	concentration (ng g-1)	concentration (ng g-1)	concentration (ng g-1)	concentration (ng g-1)	N1	N2	MDL (ng/g)	MQL (ng/g)	Anaerobically digested sludge (ng/g)	Composted sludge (ng/g)
				PLASCTICIZERS
				BISPHENOLS (BPs)
	343	1	1	Bisphenol A	BPA		0.5	10.9	0.3	0.3	166	0.3	0.3	0.7	0.5	0.5	0.4	0.5	0.2	0.2	0.3	1.2	0.5	38.7	3.3	13.4	ND	6.4	ND	1.5	ND	ND	ND	3.6	ND	0.7	ND	ND	40	41.4	49.9	49.6	89.7	<MQL	<MQL	3.06	10.2	57.9	65.8
	344	2	2	Bisphenol AF	BPAF		0.2	0.2	ND	ND	ND	ND	ND	ND	ND	ND	ND	ND	ND	ND	ND	ND	ND	ND	ND	0.2	0.2	0.2	ND	0.2	0.2	ND	ND	ND	ND	ND	ND	ND
	345	3	3	Bisphenol AP	BPAP		0.3	0.52	ND	ND	ND	ND	ND	ND	ND	ND	ND	ND	0.3	2.6	0.9	0.3	0.8	ND	ND	0.3	0.3	0.5	0.3	0.4	0.4	0.4	0.3	0.4	0.3	0.3	0.3	0.3
	346	4	4	Bisphenol B	BPB		0.4	0.38	0.3	0.4	0.5	0.4	0.5	ND	ND	ND	ND	ND	ND	ND	ND	ND	ND	0.3	0.3	ND	ND	˂LOQ	ND	ND	ND	ND	ND	ND	ND	ND	ND	ND
	347	5	5	Bisphenol BP	BPBP		0.4	0.41	0.5	0.4	0.5	0.4	0.4	ND	ND	ND	ND	ND	ND	ND	ND	ND	ND	0.3	0.4	ND	ND	ND	ND	ND	ND	ND	ND	ND	ND	ND	ND	ND
	348	6	6	Bisphenol C	BPC
	349	7	7	Bisphenol CI	BPCI
	350	8	8	Bisphenol E	BPE		˂LOQ	˂LOQ	ND	ND	ND	ND	ND	ND	ND	ND	ND	ND	ND	ND	ND	ND	ND	ND	ND	ND	ND	ND	ND	ND	ND	ND	ND	ND	ND	ND	ND	ND
	351	9	9	Bisphenol F	BPF		3.15	37.8	ND	ND	212.9	ND	ND	1.3	ND	ND	ND	ND	ND	ND	ND	ND	ND	3.7	2.6	1.3	ND	5	ND	ND	ND	ND	ND	ND	ND	ND	ND	ND
	352	10	10	Bisphenol FL	BPFL		0.5	0.48	0.5	0.4	0.5	0.5	0.5	ND	ND	ND	ND	ND	ND	ND	ND	ND	ND	0.5	0.5	ND	ND	ND	ND	ND	ND	ND	ND	ND	ND	ND	ND	ND
	353	11	11	Bisphenol G	BPG
	354	12	12	Bisphenol M	BPM		ND	ND
	355	13	13	Bisphenol P	BPP		1	11.14	1.6	ND	ND	ND	ND	ND	ND	ND	ND	78.2	ND	ND	ND	ND	ND	ND	0.9	6.1	0.3	ND	1.1	0.4	ND	0.5	ND	ND	ND	ND	ND	ND
	356	14	14	Bisphenol PH	BPPH		0.7	0.73	0.6	0.7	0.6	0.6	0.9	ND	ND	ND	ND	ND	ND	ND	ND	ND	ND	0.9	0.8	ND	ND	ND	ND	ND	ND	ND	ND	ND	ND	ND	ND	ND
	357	15	15	Bisphenol S	BPS		0.3	0.3	0.3	0.3	0.6	0.2	0.2	ND	ND	ND	ND	ND	ND	ND	ND	ND	ND	0.3	0.3	ND	ND	ND	ND	ND	ND	0.2	ND	ND	ND	ND	ND	ND
	358	16	16	Bisphenol TMC	BP-TMC		ND	ND
	359	17	17	Bisphenol Z	BPZ		ND	ND	˂LOQ	ND	ND	ND	ND	ND	ND	ND	ND	ND	ND	ND	ND	ND	ND	ND	ND	ND	ND	ND	ND	ND	ND	ND	ND	ND	ND	ND	ND	ND
	360	18	18	Tetrabromobisphenol A	TBBPA
	361	19	19	Tetrachlorobisphenol A	TCBPA
	362	20	20	Tetrabromobisphenol S	TBBPS
				Total bisphenols
[truncated: 39 more columns]

## Sheet: Sheet 7-PHTHALATES
				Reference number		110	110	110	110	110	110	110	110	110	110	110	110	111	111	111	111	113	113	113	113	Statistics							120	120	120	120			121	121	121	121	121	121	Statistics
				Chromatographic separation (GC or LC)
				Extraction technique (SPE, dSPE)
				Cleanup
				Analysis
				Matrix		CLAY (μg/g)	CLAY (μg/g)	CLAY (μg/g)	CLAY (μg/g)	SILTS (μg/g)	SILTS (μg/g)	SILTS (μg/g)	SILTS (μg/g)	SAND (μg/g)	SAND (μg/g)	SAND (μg/g)	SAND (μg/g)									Soil																			Sewage sludge
				Unit		Min	Max	mean	median	Min	Max	mean	median	Min	Max	mean	median	Min (μg/g)	Max (μg/g)	Median (μg/g)	Mean (μg/g)	Mean	Min	Max	Median	Min (μg/g)	Median (μg/g)	Mean (μg/g)	95th percentile (μg/g)	Max (μg/g)	STD (μg/g)														Min (μg/g)	Median (μg/g)	Mean (μg/g)	95th percentile (μg/g)	Max (μg/g)
				PLASCTICIZERS
				PHTHALIC ACID ESTERS (PAEs)
	363	21	1	Dimethyl phthalate	DMP	0.007	0.608	0.15	0.087	0.01	0.33	0.072	0.045	0.133	3.62	0.843	0.724	nd	0.116	0.0235	0.0301	0.47	0.02	3.44	0.14	0.007	0.133	0.572032	3.458	3.62	1.07355		0.031	1.2	0.45	1.08	0.31	1.86	6.1	6.1	6.1	4.4	2.27	5.7	0.031	2.065	2.96675	6.1	6.1
	364	22	2	Diethylphthalate	DEP	0.005	0.427	0.085	0.024	0.003	0.185	0.029	0.013	0.006	0.048	0.015	0.011	nd	0.622	0.0359	0.119	0.42	nd	2.43	0.14	0.003	0.04195	0.25655	0.8932	2.43	0.571201		0.065	0.072	0.071	4.84	4.27	5.41	3.44	3.44	3.45	5.82	2.09	11.15	0.065	3.445	3.6765	8.2185	11.15
	365	23	3	Dibutyl phthalate	DBP													nd	1.413	0.214	0.287	31.74	3.1	170.77	18.58	0.214	3.1	32.3006	129.061	170.77	62.214		3	5.9	0.438	27.99	4.27	51.72	1093.87	939.16	1248.58	429.67	311.38	519.47	0.438	181.55	386.287	1163.49	1248.58
	366	24	4	Diisobutyl phthalate	DiBP	0.023	2.285	0.6	0.361	0.028	2.686	0.451	0.384	0.066	3.349	0.892	0.411	nd	0.724	0.0812	0.113	12.89	nd	179.2	1.08	0.023	0.5255	11.4236	37.8365	179.2	41.9783		0.52	0.77	0.67										0.52	0.67	0.653333	0.76	0.77
	367	25	5	Di(2-ethoxyethyl) phthalate	DEEP	N.D.	0.385	0.036	N.D.	N.D.	0.128	0.011	N.D.	N.D.	0.066	0.007	N.D.	nd	nd	nd	nd					0.007	0.051	0.1055	0.32075	0.385	0.143979														n.m.	n.m.	n.m.	n.m.	n.a.
	368	26	6	Di-n-hexyl phthalate	DHP	N.D.	0.006	0.001	0.001	N.D.	0.004	O.OOI	0.001	N.D.	0.012	0.003	0.002	nd	nd	nd	nd					0.001	0.0025	0.00375	0.0099	0.012	0.00377018														n.m.	n.m.	n.m.	n.m.	n.a.
	369	27	7	Butylbenzyl phthalate	BBzP	N.D.	0.075	0.007	0.003	N.D.	0.045	0.006	0.003	N.D.	0.029	0.007	0.004	nd	0.688	0.0982	0.159					0.003	0.018	0.0936833	0.39705	0.688	0.19344		0.095	0.17	0.12	76.36	25.96	126.76	449.36	276.91	621.81	383	338.21	440.74	0.095	201.835	228.291	526.962	621.81
	370	28	8	Di(hexyl-2-ethylhexyl)phthalate	DHEHP	N.D.	0.042	0.006	0.002	N.D.	0.025	0.004	0.003	N.D.	0.026	0.008	0.003									0.002	0.006	0.0132222	0.0356	0.042	0.0142722														n.m.	n.m.	n.m.	n.m.	n.a.
	371	29	9	Di(2-butoxyethyl) phthalate	DBEP	N.D.	0.502	0.03	0.003	N.D.	0.8	0.041	0.008	N.D.	0.45	0.032	0.006	nd	0.221	0.0215	0.035					0.003	0.0335	0.179125	0.6361	0.8	0.263493														n.m.	n.m.	n.m.	n.m.	n.a.
	372	30	10	Bis(2-ethylhexyl) phthalate	DEHP	0.012	15.023	2.443	0.644	0.017	18.118	1.726	444	0.141	11.069	1.355	0.604	nd	2.314	0.373	0.414	17.2	0.75	164.96	4.81	0.012	1.726	36.1038	192.864	444	105.566		64	92	71	120.48	39.96	200.99	311.68	270.66	352.7	353.77	246.04	481.27	39.96	223.515	217.046	411.145	481.27
	373	31	11	Di-n-octyl phthalate	DOP	N.D.	0.309	0.048	0.008	N.D.	0.25	0.03	0.008	N.D.	0.185	0.025	0.004	nd	0.606	0.0855	0.152					0.004	0.06675	0.142542	0.44265	0.606	0.17838					103.55	43.64	163.45	83.45	71.98	94.92	142.78	82.82	214.3	43.64	94.92	111.21	193.96	214.3
	374	32	12	Di-n-nonyl phthalate	DNP	N.D.	0.141	0.024	0.007	N.D.	0.099	0.012	0.004	N.D.	0.079	0.012	0.004	nd	nd	nd	nd					0.004	0.012	0.0424444	0.1242	0.141	0.0508112														n.m.	n.m.	n.m.	n.m.	n.a.
	375	33	13	Diisononyl phthalate	DiNP																					n.m.	n.m.	n.m.	n.m.	n.a.	n.a.		22	26	22										22	22	23.3333	25.6	26
	376	34	14	Diisodecyl phthalate	DiDP																					n.m.	n.m.	n.m.	n.m.	n.a.	n.a.		8.4	4.1	0.708										0.708	4.1	4.40267	7.97	8.4
	377	35	15	Bis(2-methoxyethyl) phthalate	DMEP													nd	0.817	0	0.0864					0	0.0864	0.301133	0.74394	0.817	0.448837														n.m.	n.m.	n.m.	n.m.	n.a.
				Total phthalates (μg/g)																						0.283	5.8026	81.538	366.823	803.511	212.7														107.457	734.1	977.867	2344.21	2618.38
				Total phthalates (ng/g)																						283	5802.6	81538	366823	803511	212700														107457	734100	977867	2.34421e+06	2618380
[truncated: 1 more columns]

## Sheet: Sheet 8-SDPAs
	GROUP	CLASS	ANALYTE	Reference number			129	129	130	130	130	130	130	130	Statistics							128	128	128	128	128	128	Statistics
				Matrix			Biosolids	Biosolids	Biosolids	Biosolids	Biosolids	Biosolids	Biosolids	Biosolids	Biosolids							Indoor dust	Indoor dust	Indoor dust	Playground dust	Playground dust	Playground dust	Dust
				Unit			Min (ng/g)	Max (ng/g)	Min (ng/g)	Median (ng g-1)	Max (ng/g)	Min (ng/g)	Median (ng g-1)	Max (ng/g)	Min (ng/g)	Median (ng/g)	Mean (ng/g)	95th percentile (ng/g)	Max (ng/g)	STDEV								Min (ng/g)	Median (ng/g)	Mean (ng/g)	95th percentile (ng/g)	Max (ng/g)	STDEV
				RUBBER AND POLYMER ANTIOXIDANTS (AROMATIC SECONDARY AMINES - Ar-SAs)
				SUBSTITUTED DIPHENYLAMINES (S-DPAs)
	378	1	1	Diphenylamine	DPA		1.64	106	0.27	8.97	17.7	0.64	12	153	0.27	10.485	37.5275	136.55	153	58.4556		8.71	25.5	129	2.33	8.02	32.6	2.33	17.105	34.36	104.9	129	47.7828
	379	2	2	Isopropyl-diphenylamine	IP-DPA		1.64	106	0.27	8.97	17.7	0.9	0.45	135	0.27	5.305	33.8662	124.85	135	54.3575
	380	3	3	Dimethyl-acridan	DM-AD		1.64	106	0.27	8.97	17.7	1.5	3.1	32	0.27	6.035	21.3975	80.1	106	35.8679
	381	4	4	Isopropyl-dimethyl-acridine	IPDM-AD		1.64	106	0.27	8.97	17.7	0.6	0.51	6.9	0.27	4.27	17.8237	75.095	106	36.1332
	382	5	5	Diisopropyl-diphenylamine	DIP-DPA		1.64	106	0.27	8.97	17.7	1.2	NA	20	0.27	8.97	22.2543	80.2	106	37.7871
	383	6	6	Diisopropyl-dimethyl-acridine	DIPDM-AD		1.64	106	0.27	8.97	17.7	n.a.	NA	n.a.	0.27	8.97	26.916	88.34	106	44.7497
	384	7	7	Styrenated diphenylamine	S-DPA1		214	944	0.27	72.38	118	0.6	3	176	0.27	95.19	191.031	688.5	944	315.127
	385	8	8	Styrenated diphenylamine	S-DPA2		214	944	0.27	72.38	118	1.2	3.2	169	0.27	95.19	190.256	688.5	944	315.116
	386	9	9	Tertoctyl-diphenylamine	TO-DPA		214	944	0.27	72.38	118	6.2	100	435	0.27	109	236.231	765.85	944	318.235
	387	10	10	Isooctyl (tertoctyl)-styrenated diphenylamine 1	TOS-DPA1		214	944	0.27	72.38	118	1.5	5.3	59	0.27	65.69	176.806	688.5	944	318.371
	388	11	11	Isooctyl (tertoctyl)-styrenated diphenylamine 2	TOS-DPA2		214	944	0.27	72.38	118	1.5	6.3	88	0.27	80.19	180.556	688.5	944	316.922
	389	12	12	Isooctyl (tertoctyl)-styrenated diphenylamine 3	TOS-DPA3		214	944	0.27	72.38	118	1.8	32	208	0.27	95.19	198.806	688.5	944	312.637
	390	13	13	Diisooctyl (ditertoctyl)-styrenated diphenylamine	DTOS-DPA		214	944	0.27	72.38	118	59	3.1	1269	0.27	95.19	334.969	1155.25	1269	488.776
	391	14	14	Diisooctyl (ditertoctyl)-diphenylamine	DTO-DPA		214	944	0.27	72.38	118	2.4	265	42	0.27	95.19	207.256	706.35	944	312.695
	392	15	15	Dicyclohexylamine	DChA																	˂LOQ	1.44	70.7	˂LOQ	˂LOQ	˂LOQ	1.44	36.07	36.07	67.237	70.7	48.9742
	393	16	16	N-phenyl-1-naphthylamine	AO-A																	4.56	14.6	120	˂LOQ	5.42	299	4.56	14.6	88.716	263.2	299	127.192
	394	17	17	N-phenyl-2-naphthylamine	AO-D																	3.3	15.9	170	˂LOQ	4.79	137	3.3	15.9	66.198	163.4	170	80.692
	395	18	18	4,4'-di-tert-butyldiphenylamine	di-t-bu-DPA																	˂LOQ	4.47	10.7	3.22	119	8070	3.22	10.7	1641.48	6479.8	8070	3593.99
	396	19	19	4,4′-di-n-octylphenylamine	di-n-oc-DPA																	˂LOQ	9.03	78.1	˂LOQ	70.2	4590	9.03	74.15	1186.83	3913.21	4590	2268.99
	397	20	20	4,4′-bis(1,1-dimethylbenzyl)diphenylamine	diAMS																	˂LOQ	5.12	254	3.37	46.1	290	3.37	46.1	119.718	282.8	290	140.639
				S-DPAs											3.78	774.865	1875.7	6655.08	8589	2965.23								27.25	214.625	3173.37	11274.6	13618.7	6308.25

## Sheet: Sheet 9-SPPDs
				Reference number			106	106	106	107	107	107	Statistics							128	128	128	128	128	128	135	135	136	136	136	136	137	138	100	100	100	100	Statistics
				Matrix			Biosolids	Biosolids	Biosolids	Biosolids	Biosolids	Biosolids								Dust	Dust	Dust	Dust	Dust	Dust	Tunnel dust	Tunnel dust	Dust	Dust	Dust	Dust	Dust	Roadside soil	Dust	Dust	Dust	Dust
				Unit			Min (ng/g)	Median (ng g-1)	Max (ng/g)	Min (ng/g)	Median (ng g-1)	Max (ng/g)	Biosolids							Indoor dust GM (ng.g-1)	Indoor dust GM (ng.g-1)	Indoor dust GM (ng.g-1)	Playground dust GM (ng. g-1)	Playground dust GM (ng. g-1)	Playground dust GM (ng. g-1)	Tunnel I dust Median (ng g-1)	Tunnel II dust Median (ng g-1)	Road dust Median (ng g-1)	Parking Lot Dust Median (ng g-1)	Vehicle Dust Median (ng g-1)	House Dust Median (ng g-1)	Road dust Median (ng g-1)	Roadside soil Median (ng g-1)	Min conc (ng g-1)	Max conc (ng g-1)	Median conc (ng g-1)	Mean conc (ng g-1)	Dust
													Min (ng/g)	Median (ng/g)	Mean (ng/g)	95th percentile (ng/g)	Max (ng/g)	STDEV																				Min (ng/g)	Median (ng/g)	Mean (ng/g)	95th percentile (ng/g)	Max (ng/g)	STDEV
				RUBBER AND POLYMER ANTIOXIDANTS (AROMATIC SECONDARY AMINES - Ar-SAs)
				SUBSTITUTED p-PHENYLENEDIAMINES (S-PPDs)
	398	21	1	N-(1,4-dimethylpentyl)-N′-phenylbenzene-1,4-diamine	77PD								0	n.a.	n.a.	n.a.	0	n.a.										˂LOQ	˂LOQ	˂LOQ	2							2	2	2	2	2	n.a.
	399	22	2	N-isopropyl-N′-phenyl-p-phenylenediamine	IPPD								0	n.a.	n.a.	n.a.	0	n.a.										55	8.9	24.9	˂LOQ		1.13					1.13	16.9	22.4825	50.485	55	23.8303
	400	23	3	N-phenyl-N′-cyclohexyl-p-phenylenediamine	CPPD								0	n.a.	n.a.	n.a.	0	n.a.		˂LOQ	˂LOQ	˂LOQ	˂LOQ	˂LOQ	˂LOQ			50.2	65	24.4	˂LOQ		1.19					1.19	37.3	35.1975	62.78	65	28.2038
	401	24	4	N-(1.3-dimethylbutyl)-N′-phenyl-p-phenylenediamine	6PPD								0	n.a.	n.a.	n.a.	0	n.a.		˂LOQ	16.4	180	˂LOQ	30.4	685	1.5	1.9	52.5	241	19.3	0.3	329	309	1.08	490	1.34	164	0.3	41.45	157.67	538.75	685	206.074
	402	25	5	N,N′-diphenyl-p-phenylenediamine	DPPD		1.58	26.12	50.7	3	3	105	1.58	14.56	31.5667	91.425	105	40.791		˂LOQ	1.79	22.2	˂LOQ	1.11	22.6			34.9	9.2	32.8	0.2		11.8					0.2	11.8	15.1778	34.06	34.9	13.4746
	403	26	6	N-phenyl-N′-(o-tolyl)-p-phenylenediamine	PTPD		1.58	26.12	50.7	2.7	5.2	158	1.58	15.66	40.7167	131.175	158	60.5087																				0	n.a.	n.a.	n.a.	0	n.a.
	404	27	7	N,N′-di(o-tolyl)-p-phenylenediamine	DTPD		1.58	26.12	50.7	3	3.5	103	1.58	14.81	31.3167	89.925	103	40.0027															4.82					4.82	4.82	4.82	4.82	4.82	n.a.
	405	28	8	N,N′-di-2-naphthyl-p-phenylenediamine	DNPD								0	n.a.	n.a.	n.a.	0	n.a.										3.4	1	5.4	0.7							0.7	2.2	2.625	5.1	5.4	2.20964
	406	29	9	N-isopropyl-N′-phenyl-1,4-phenylenediamine-quinone	IPPD-Q								0	n.a.	n.a.	n.a.	0	n.a.															3.06					3.06	3.06	3.06	3.06	3.06	n.a.
	407	30	10	N-phenylN′-cyclohexyl-p-phenylenediamine-quinone	CPPD-Q								0	n.a.	n.a.	n.a.	0	n.a.															3.12					3.12	3.12	3.12	3.12	3.12	n.a.
	408	31	11	N-(1,3-dimethylbutyl)-N′-phenyl-p-phenylenediamine-quinone	6PPD-Q								0	n.a.	n.a.	n.a.	0	n.a.								220	270	32.2	41.8	80.9	˂LOQ	809	234	0.17	12.3	0.87	4.43	0.17	41.8	155.061	539.5	809	239.907
	409	32	12	N,N′-diphenyl-p-phenylenediamine-quinone	DPPD-Q								0	n.a.	n.a.	n.a.	0	n.a.															60.2					60.2	60.2	60.2	60.2	60.2	n.a.
	410	33	13	N,N′-di(o-tolyl)-p-phenylenediamine-quinone	DTPD-Q								0	n.a.	n.a.	n.a.	0	n.a.															7.94					7.94	7.94	7.94	7.94	7.94	n.a.
				S-PPDs									4.74	45.03	103.6	312.525	366	141.302																				84.83	232.59	469.354	1311.82	1735.44	513.7

## Sheet: Sheet 10-NEONICOTINOIDS
				Reference number			13	13		139	139	139	139	139	139	139	140	140	140	140	140	140	140	140	140	140	140	140	140	140	140	140	140	140	140	140	140	140	140	140	140	140	140	140	140	140	140	140	140
				Chromatographic separation (GC or LC)			UPLC	UPLC		LC	LC	LC	LC	LC	LC	LC	UPLC	UPLC	UPLC	UPLC	UPLC	UPLC	UPLC	UPLC	UPLC	UPLC	UPLC	UPLC	UPLC	UPLC	UPLC	UPLC	UPLC	UPLC	UPLC	UPLC	UPLC	UPLC	UPLC	UPLC	UPLC	UPLC	UPLC	UPLC	UPLC	UPLC	UPLC	UPLC	UPLC
				Extraction technique (SPE, dSPE)			Espresso	PHWE		d-LLME	d-LLME	d-LLME	d-LLME	d-LLME	d-LLME	d-LLME	Centrifugation	Centrifugation	Centrifugation	Centrifugation	Centrifugation	Centrifugation	Centrifugation	Centrifugation	Centrifugation	Centrifugation	Centrifugation	Centrifugation	Centrifugation	Centrifugation	Centrifugation	Centrifugation	Centrifugation	Centrifugation	Centrifugation	Centrifugation	Centrifugation	Centrifugation	Centrifugation	Centrifugation	Centrifugation	Centrifugation	Centrifugation	Centrifugation	Centrifugation	Centrifugation	Centrifugation	Centrifugation	Centrifugation
				Cleanup			SPE	SPE		Filtration	Filtration	Filtration	Filtration	Filtration	Filtration	Filtration	d-SPE	d-SPE	d-SPE	d-SPE	d-SPE	d-SPE	d-SPE	d-SPE	d-SPE	d-SPE	d-SPE	d-SPE	d-SPE	d-SPE	d-SPE	d-SPE	d-SPE	d-SPE	d-SPE	d-SPE	d-SPE	d-SPE	d-SPE	d-SPE	d-SPE	d-SPE	d-SPE	d-SPE	d-SPE	d-SPE	d-SPE	d-SPE	d-SPE
				Analysis			MS/MS	MS/MS		MS/MS	MS/MS	MS/MS	MS/MS	MS/MS	MS/MS	MS/MS
				Matrix			Sewage sludge	Sewage sludge		Agricultural areas	Commercial areas	Education areas	Industrial areas	Parks	Residential areas	Main traffic areas	Soil	Soil	Soil	Soil	Soil	Soil	Soil	Soil	Soil	Soil	Soil	Soil	Soil	Soil	Soil	Soil	Soil	Soil	Soil	Soil	Soil	Soil	Soil	Soil	Soil	Soil	Soil	Soil	Soil	Soil	Soil	Soil	Soil
				Unit			Espresso (n=3) µg/kg	Pressurized Hot Water Extraction (PHWE) (n=3) µg/kg		Geometric mean (ng/g)	Geometric mean (ng/g)	Geometric mean (ng/g)	Geometric mean (ng/g)	Geometric mean (ng/g)	Geometric mean (ng/g)	Geometric mean (ng/g)	Soil (ng/g)	Soil (ng/g)	Soil (ng/g)	Soil (ng/g)	Soil (ng/g)	Soil (ng/g)	Soil (ng/g)	Soil (ng/g)	Soil (ng/g)	Soil (ng/g)	Soil (ng/g)	Soil (ng/g)	Soil (ng/g)	Soil (ng/g)	Soil (ng/g)	Soil (ng/g)	Soil (ng/g)	Soil (ng/g)	Soil (ng/g)	Soil (ng/g)	Soil (ng/g)	Soil (ng/g)	Soil (ng/g)	Soil (ng/g)	Soil (ng/g)	Soil (ng/g)	Soil (ng/g)	Soil (ng/g)	Soil (ng/g)	Soil (ng/g)	Soil (ng/g)	Soil (ng/g)	Soil (ng/g)
				PESTICIDES
				NEONICOTINOID INSECTICIDES
	411	1	1	Imidacloprid	IMI		1.4	3.3		0.58	0.13	0.003	0.005	0.003	0.006	0.003	1.52	1.08	1.34	0.32	0.98	6.51	4.87	5.04	6.38	0.84	0.88	0.9	4.27	1.28	0.92	0.99	2.74	2.51	10.57	2.74	0.53	2.84	1.85	1.68	0.1	0.17	5.27	0.94	0.96	4.75	6.32		0.42
	412	2	2	Thiamethoxam	TMX					0.02	0.003	0.001	0.005	0.001	0.002	0.005				1.98	2.21	8.67	6.43				11.55		3.18			1.22		1.35				6.61				6.27		0.8			1.69
	413	3	3	Clothianidin	CLT					0.04	0.02	0.004	0.003	0.003	0.01	0.03	1.55					2.63				5.84			12.25	2.51	21.63		1.89		3.62		13.11				0.42	5.99	2.74	0.87				2.63
	414	4	4	Acetamiprid	ACT					0.06	0.03	0.02	0.05	0.03	0.04	0.07			0.56	2.6	0.75	5.94			1.45		3.31	2.76	2.75	2.48	2.06	1.66	1.42	0.72	3.67	4.37	2.95			0.56	9.65	8.48	6.25	4.37	2.95	1.32	5.48		3.53
	415	5	5	Thiacloprid	TCP					0.004	0.003	0.009	0.009	0.004	0.004	0.007																				0.54							2.68
	416	6	6	Dinotefuran	DNT													0.88						0.89						0.57			0.3						0.74
	417	7	7	Nitenpyram	NTP																			0.44							0.31				2.55					5.17						0.52		5.25
	418	8	8	Imidaclothiz	IMC
	419	9	9	Flonicamid	FLN
[truncated: 123 more columns]

[truncated: 3 more sheets: Top 30 PPs (Mean), Top CECs (Mean), Composition profile]
